# Supplementary material for: Three-component microwave-assisted synthesis of 3,5-disubstituted pyrazolo[3,4-d]pyrimidin-4-ones
Source: Royal Society of Chemistry journal article supplement (doi:10.1039/d2ra00980c), 2022-01-01
Supplement: d2ra00980c3.pdf [file d2ra00980c3.pdf]

*RSC Advances*

## Electronic Supplementary Information

# Three-Component Microwave-Assisted Synthesis of 3,5-Disubstituted Pyrazolo[3,4-*d*]pyrimidin-4-ones

*Jia Hui Ng,<sup>a</sup> Edward R. T. Tiekink<sup>b</sup> and Anton V. Dolzhenko<sup>\*,a,c</sup>*

<sup>a</sup> School of Pharmacy, Monash University Malaysia, Jalan Lagoon Selatan, Bandar Sunway, Selangor Darul Ehsan 47500, Malaysia

<sup>b</sup> Research Centre for Crystalline Materials, School of Medical and Life Sciences, Sunway University, 5 Jalan Universiti, Bandar Sunway, Selangor Darul Ehsan 47500, Malaysia

<sup>c</sup> Curtin Medical School, Curtin Health Innovation Research Institute, Faculty of Health Sciences, Curtin University, GPO Box U1987 Perth, Western Australia 6845, Australia

## Contents

|                                                                                                                                                  |        |
|--------------------------------------------------------------------------------------------------------------------------------------------------|--------|
| Molecular packing in 5-benzyl-3-(4-methylphenylamino)-1,5-dihydro-4 <i>H</i> -pyrazolo[3,4- <i>d</i> ]pyrimidin-4-one ( <b>4d</b> )              | .....3 |
| Molecular packing in 3-(4-bromophenylamino)-5-(4-methoxyphenyl)-1,5-dihydro-4 <i>H</i> -pyrazolo[3,4- <i>d</i> ]pyrimidin-4-one ( <b>4p</b> )    | .....4 |
| Copies of <sup>1</sup> H and <sup>13</sup> C NMR spectra for prepared 3,5-disubstituted pyrazolo[3,4- <i>d</i> ]pyrimidin-4-ones ( <b>4a-t</b> ) | .....5 |

**Molecular packing in 5-benzyl-3-(4-methylphenylamino)-1,5-dihydro-4H-pyrazolo[3,4-*d*]pyrimidin-4-one (4d)**

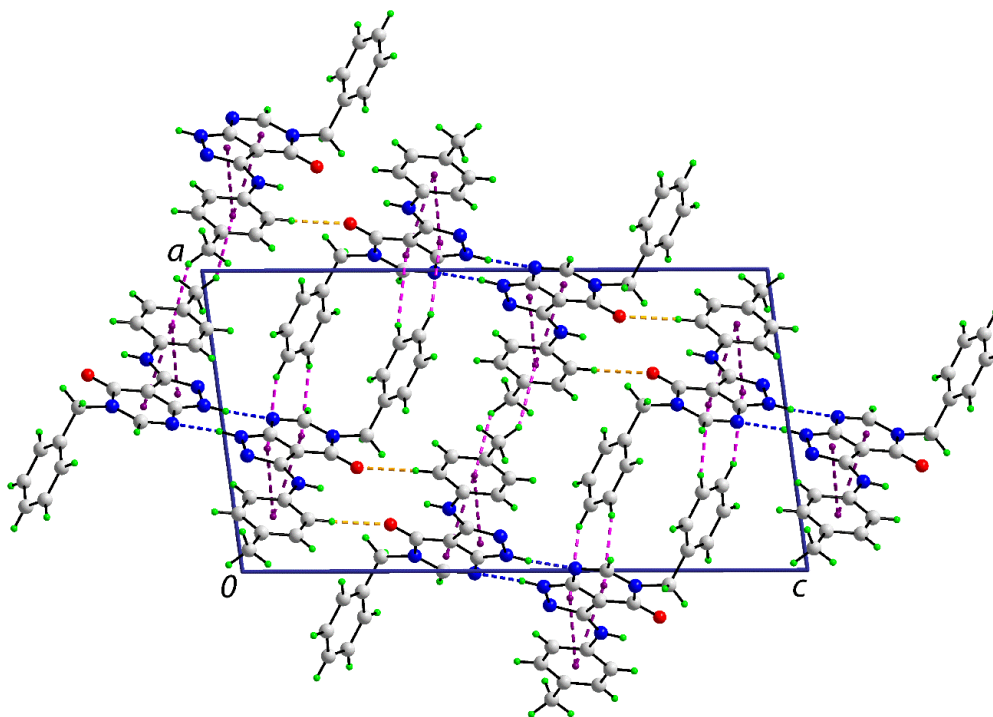

**Figure S1.** Molecular packing in **4d**: a view in projection down the *b*-axis of the unit cell contents. The N–H···N, C–H···O, C–H···π and π···π interactions are shown as blue, orange, pink and purple dashed lines, respectively.

**Geometric parameters (Å, °) characterizing the identified intermolecular interactions**

| Interaction (A–H···B)                 | H···B     | A···B      | A–H···B   | Symmetry operation                              |
|---------------------------------------|-----------|------------|-----------|-------------------------------------------------|
| N31–H31···O1                          | 2.589(12) | 3.2035(12) | 128.0(11) | $x, y, z$                                       |
| N1–H1n···N7                           | 2.061(12) | 2.9215(12) | 164.4(12) | $1-x, 1-y, -z$                                  |
| C32–H32···O1                          | 2.33      | 3.2751(14) | 178       | $\frac{1}{2}-x, \frac{1}{2}+y, \frac{1}{2}-z$   |
| C37–H37b···Cg3                        | 2.71      | 3.5213(13) | 141       | $-x, 3-y, -z$                                   |
| C54–H54···Cg(N5,N7,C3a,C4,C6,C7a)     | 2.76      | 3.5913(18) | 146       | $1\frac{1}{2}-x, -\frac{1}{2}+y, \frac{1}{2}-z$ |
| C55–H55···Cg(N1,N2,C3,C3a,C7a)        | 2.91      | 3.7465(15) | 147       | $1\frac{1}{2}-x, -\frac{1}{2}+y, \frac{1}{2}-z$ |
| Cg(N1,N2,C3,C3a,C7a)···Cg(C31-C36)    |           | 3.5566(6)  | 3.46(6)   | $x, -1+y, z$                                    |
| Cg(N5,N7,C3a,C4,C6,C7a)···Cg(C31-C36) |           | 3.3616(6)  | 5.03(5)   | $x, -1+y, z$                                    |

**Molecular packing in 3-(4-bromophenylamino)-5-(4-methoxyphenyl)-1,5-dihydro-4*H*-pyrazolo[3,4-*d*]pyrimidin-4-one (4p)**

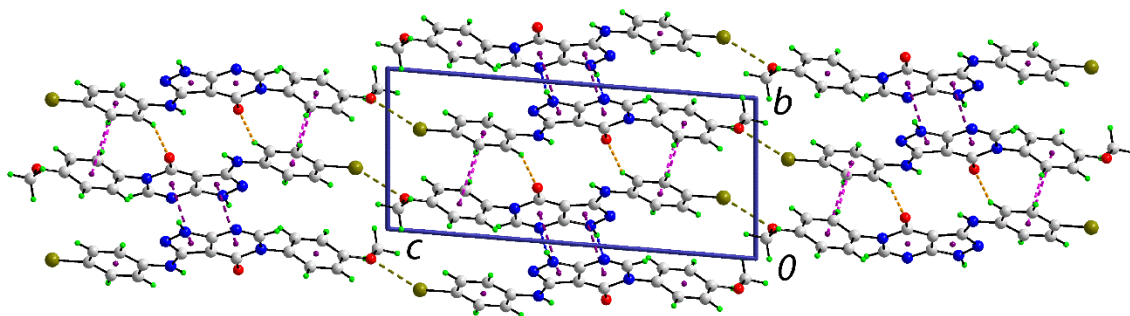

**Figure S2.** Molecular packing in **4p**: a view in projection down the *a*-axis of the unit-cell contents. The N–H···N, C–H···O, C–H··· $\pi$ ,  $\pi$ ··· $\pi$  and Br···O interactions are shown as blue, orange, pink, purple and olive dashed lines, respectively.

**Geometric parameters ( $\text{\AA}$ ,  $^\circ$ ) characterizing the identified intermolecular interactions:**

| Interaction (A–H···B)                          | H···B     | A···B      | A–H···B   | Symmetry operation                      |
|------------------------------------------------|-----------|------------|-----------|-----------------------------------------|
| N1–H1n···N7                                    | 2.039(18) | 2.9005(18) | 170.3(19) | 3- <i>x</i> , 2- <i>y</i> , 1- <i>z</i> |
| C32–H32···O1                                   | 2.37      | 3.2264(18) | 150       | 1- <i>x</i> , 1- <i>y</i> , 1- <i>z</i> |
| C33–H33···Cg(C51-C56)                          | 2.86      | 3.6487(16) | 142       | 1- <i>x</i> , 1- <i>y</i> , 1- <i>z</i> |
| C52–H52···Cg(C31-C36)                          | 2.51      | 3.2868(16) | 139       | 2- <i>x</i> , 1- <i>y</i> , 1- <i>z</i> |
| Cg(N1,N2,C3,C3a,C7a)···Cg(N5,N7,C3a,C4,C6,C7a) |           | 3.4144(8)  | 4.52(8)   | 2- <i>x</i> , 2- <i>y</i> , 1- <i>z</i> |
| C34–Br31···O51                                 |           | 3.1620(11) | 154.75(6) | -1+ <i>x</i> , <i>y</i> , 1+ <i>z</i>   |



**Copies of  $^1\text{H}$  and  $^{13}\text{C}$  NMR spectra for prepared  
3,5-disubstituted pyrazolo[3,4-*d*]pyrimidin-4-ones (4a-t)**

**5-Benzyl-3-(phenylamino)-1,5-dihydro-4H-pyrazolo[3,4-d]pyrimidin-4-one (4a)**

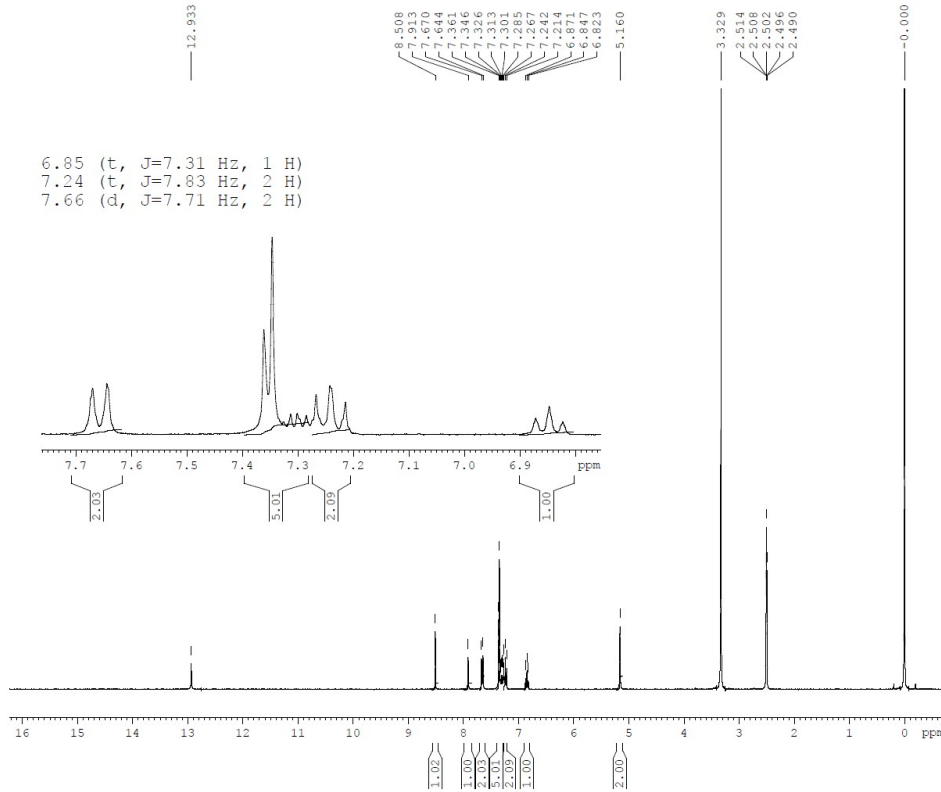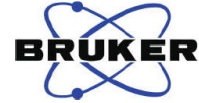

Current Data Parameters  
NAME JN212  
EXPNO 10  
PROCNO 1

F2 - Acquisition Parameters  
Date\_ 20210324  
Time\_ 10.35  
INSTRUM FOURIER300  
PROBHD 5 mm DUL 13C-1  
PULPROG zg30  
TD 65536  
SOLVENT DMSO  
NS 16  
DS 2  
SWH 6103.516 Hz  
FIDRES 0.093132 Hz  
AQ 5.3687091 sec  
RG 148.371  
DW 81.920 usec  
DE 6.50 usec  
TE 298.3 K  
D1 1.00000000 sec  
TD0 1

==== CHANNEL f1 =====  
SFO1 300.1618536 MHz  
NUC1 1H  
P1 13.50 usec  
PLW1 9.30000019 W

F2 - Processing parameters  
SI 65536  
SF 300.1599993 MHz  
WDW EM  
SSB 0  
LB 0.30 Hz  
GB 0  
PC 1.00

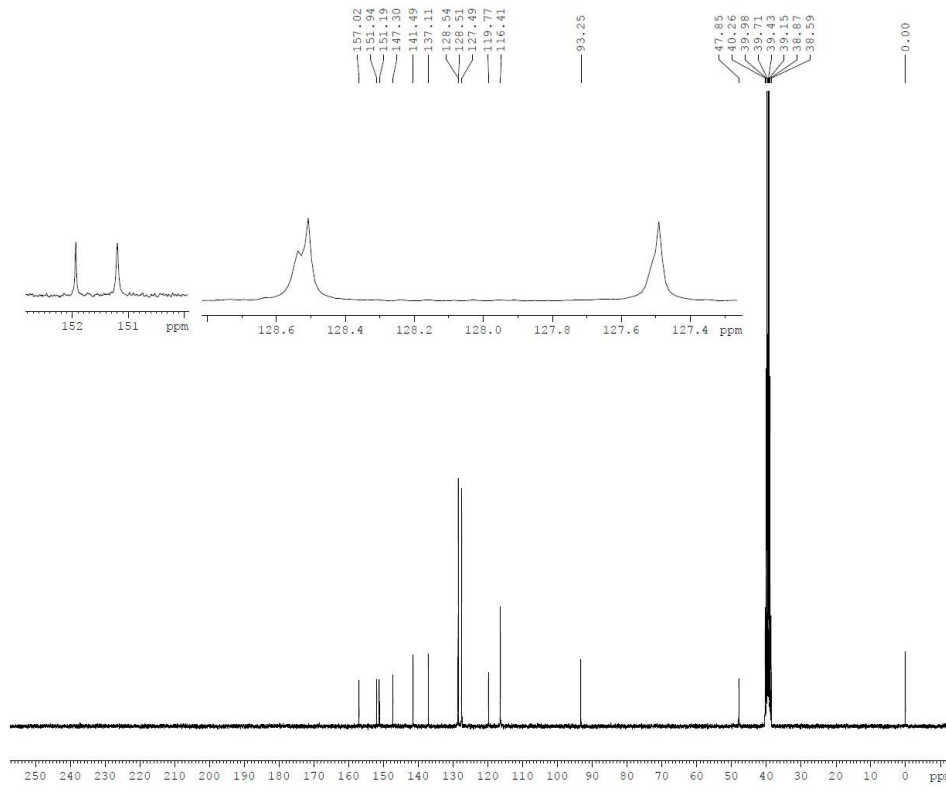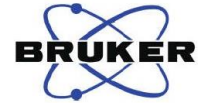

Current Data Parameters  
NAME JN212  
EXPNO 6  
PROCNO 1

F2 - Acquisition Parameters  
Date\_ 20210322  
Time\_ 16.08  
INSTRUM FOURIER300  
PROBHD 5 mm DUL 13C-1  
PULPROG zgpg30  
TD 65536  
SOLVENT DMSO  
NS 4096  
DS 4  
SWH 24414.063 Hz  
FIDRES 0.372529 Hz  
AQ 1.3421773 sec  
RG 501.187  
DW 20.480 usec  
DE 6.50 usec  
TE 298.3 K  
D1 2.00000000 sec  
D11 0.03000000 sec  
D31 0.00001300 sec  
D40 0.02898005 sec  
L4 40  
L5 57  
P32 90.00 usec  
TD0 4

==== CHANNEL f1 =====  
SFO1 75.4828392 MHz  
NUC1 13C  
P1 13.00 usec  
PLW1 22.00000000 W

==== CHANNEL f2 =====  
SFO2 300.1612006 MHz  
NUC2 1H  
CPDPRG2 waltz16  
PCPD2 90.00 usec  
PLW2 9.30000019 W  
PLW12 0.25149000 W  
PLW13 0.12650000 W

F2 - Processing parameters  
SI 32763  
SF 75.4753339 MHz  
WDW EM  
SSB 0  
LB 1.00 Hz  
GB 0  
PC 1.40

5-Benzyl-3-(phenylamino)-1,5-dihydro-4H-pyrazolo[3,4-d]pyrimidin-4-one (4a)

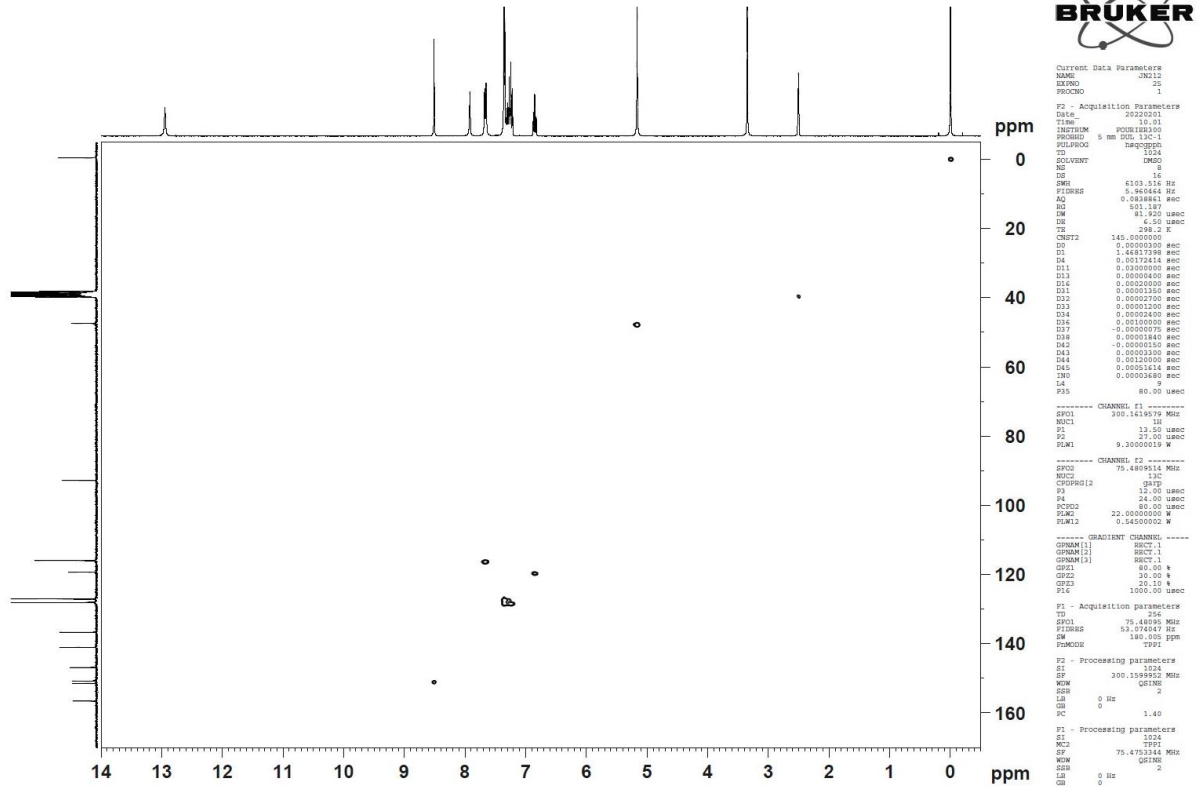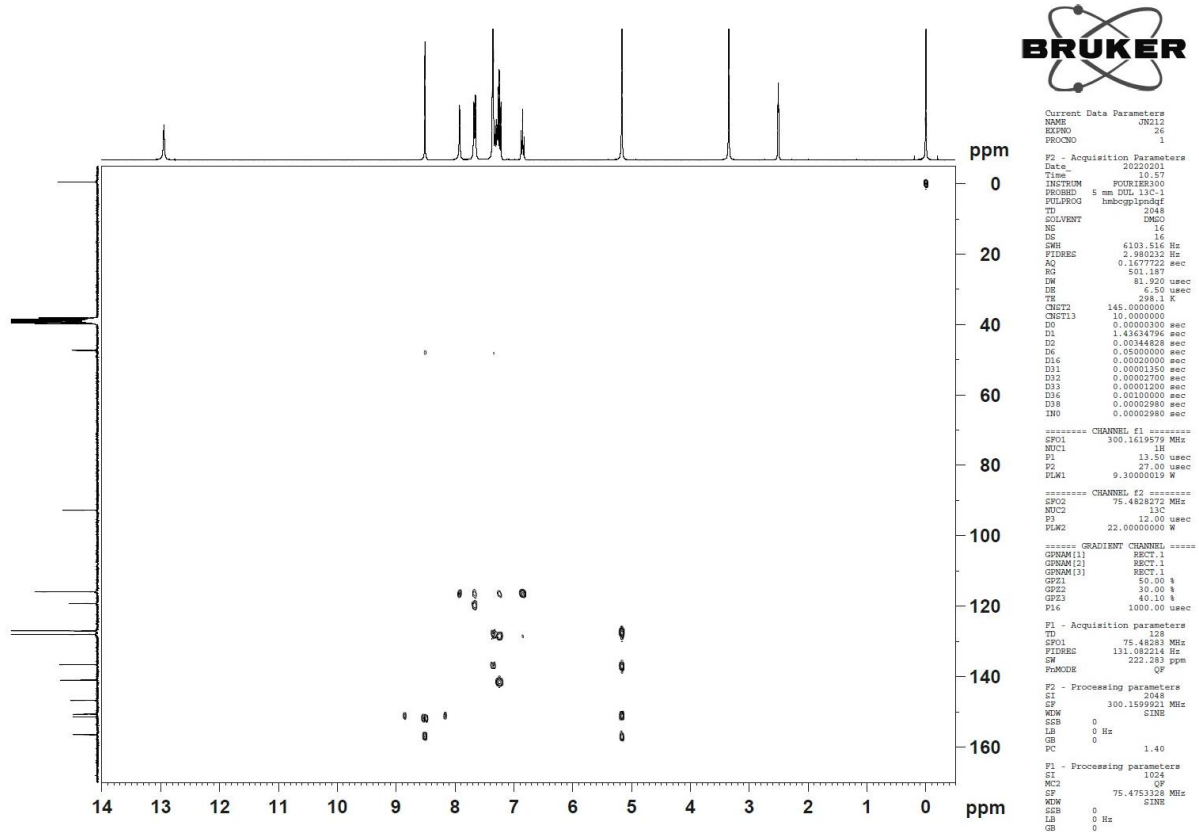

5-Benzyl-3-(4-chlorophenylamino)-1,5-dihydro-4H-pyrazolo[3,4-d]pyrimidin-4-one (4b)

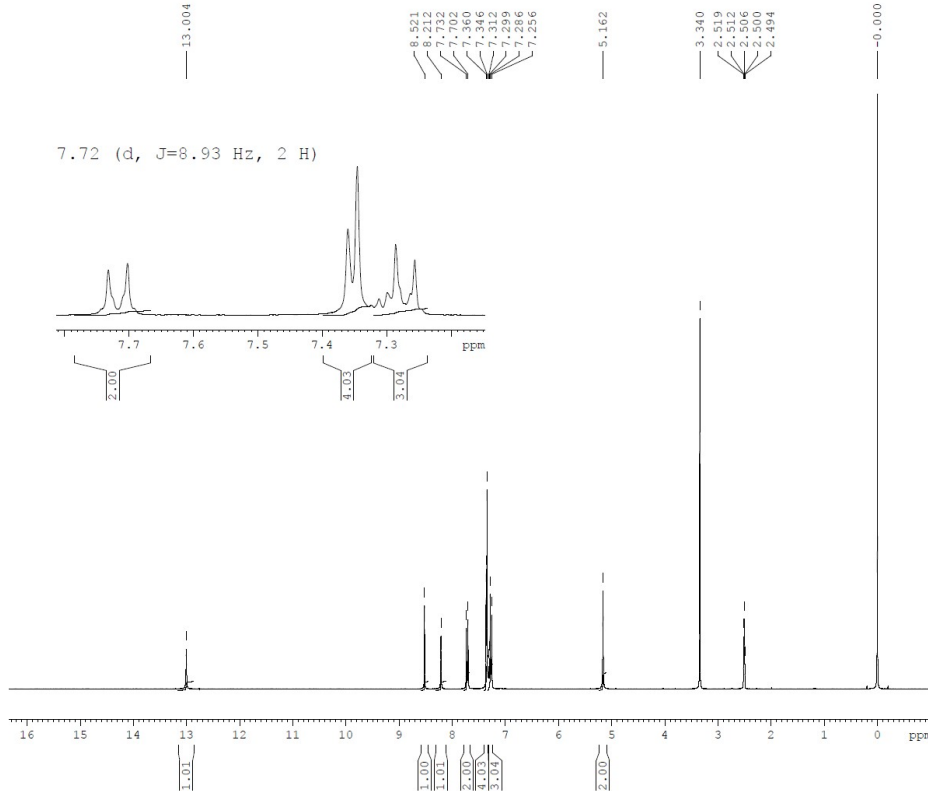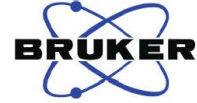

Current Data Parameters  
 NAME JN218  
 EXPNO 7  
 PROCNO 1

F2 - Acquisition Parameters  
 Date\_ 20210322  
 Time\_ 13.51  
 INSTRUM FOURIER300  
 PROBHD 5 mm DUL 13C-1  
 PULPROG zg30  
 TD 65536  
 SOLVENT DMSO  
 NS 16  
 DS 2  
 SWH 6103.516 Hz  
 FIDRES 0.093132 Hz  
 AQ 5.3687091 sec  
 RG 101.537  
 DW 81.920 usec  
 DE 6.50 usec  
 TE 298.2 K  
 D1 1.00000000 sec  
 TDO 1

===== CHANNEL f1 =====  
 SF01 300.1618536 MHz  
 NUC1 1H  
 P1 13.50 usec  
 PLW1 9.30000019 W

F2 - Processing parameters  
 SI 65536  
 SF 300.1599982 MHz  
 WDW EM  
 SSB 0  
 LB 0.30 Hz  
 GB 0  
 PC 1.00

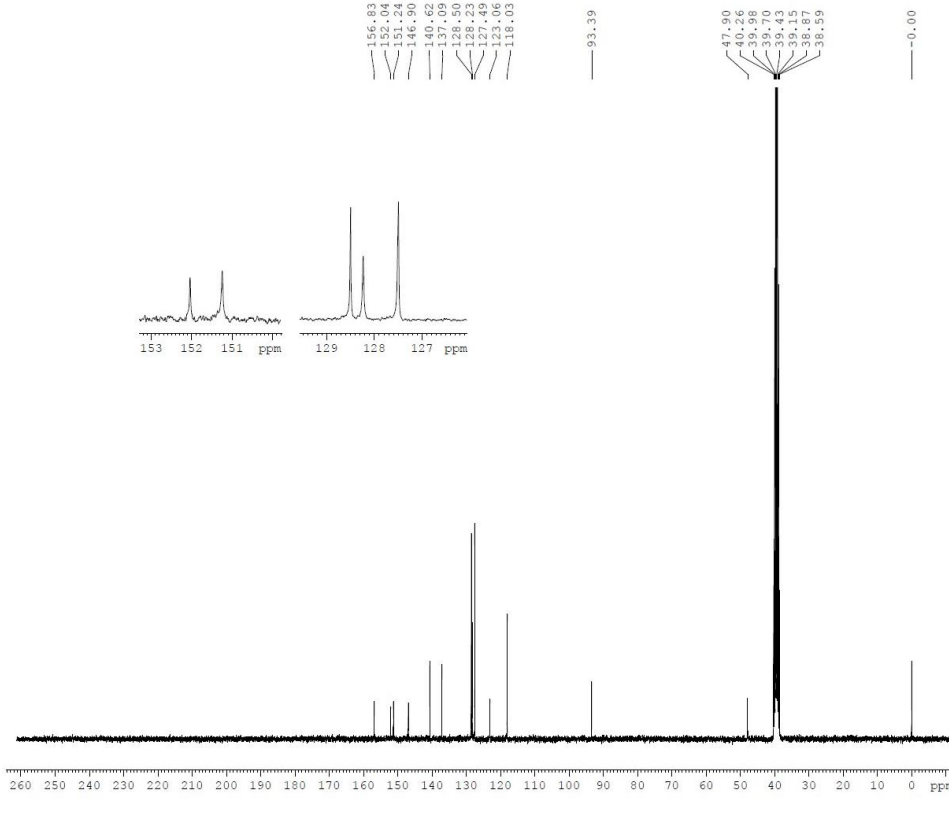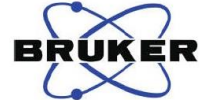

Current Data Parameters  
 NAME JN218  
 EXPNO 6  
 PROCNO 1

F2 - Acquisition Parameters  
 Date\_ 20210319  
 Time\_ 5.42  
 INSTRUM FOURIER300  
 PROBHD 5 mm DUL 13C-1  
 PULPROG zgpg30  
 TD 65536  
 SOLVENT DMSO  
 NS 3072  
 DS 4  
 SWH 24414.063 Hz  
 FIDRES 0.372529 Hz  
 AQ 1.3421773 sec  
 RG 501.187  
 DW 20.480 usec  
 DE 6.50 usec  
 TE 298.3 K  
 D1 2.00000000 sec  
 D11 0.03000000 sec  
 D31 0.00001300 sec  
 D40 0.02898005 sec  
 L4 40  
 L5 57  
 P32 90.00 usec  
 TDO 3

===== CHANNEL f1 =====  
 SF01 75.4828392 MHz  
 NUC1 13C  
 P1 13.00 usec  
 PLW1 22.00000000 W

===== CHANNEL f2 =====  
 SF02 300.1612006 MHz  
 NUC2 1H  
 CPDPRG2 waltz16  
 PCDP2 90.00 usec  
 PLW2 9.30000019 W  
 PLW12 0.25149000 W  
 PLW13 0.12650000 W

F2 - Processing parameters  
 SI 32763  
 SF 75.4753339 MHz  
 WDW EM  
 SSB 0  
 LB 1.00 Hz  
 GB 0  
 PC 1.40

5-Benzyl-3-(4-bromophenylamino)-1,5-dihydro-4H-pyrazolo[3,4-d]pyrimidin-4-one (4c)

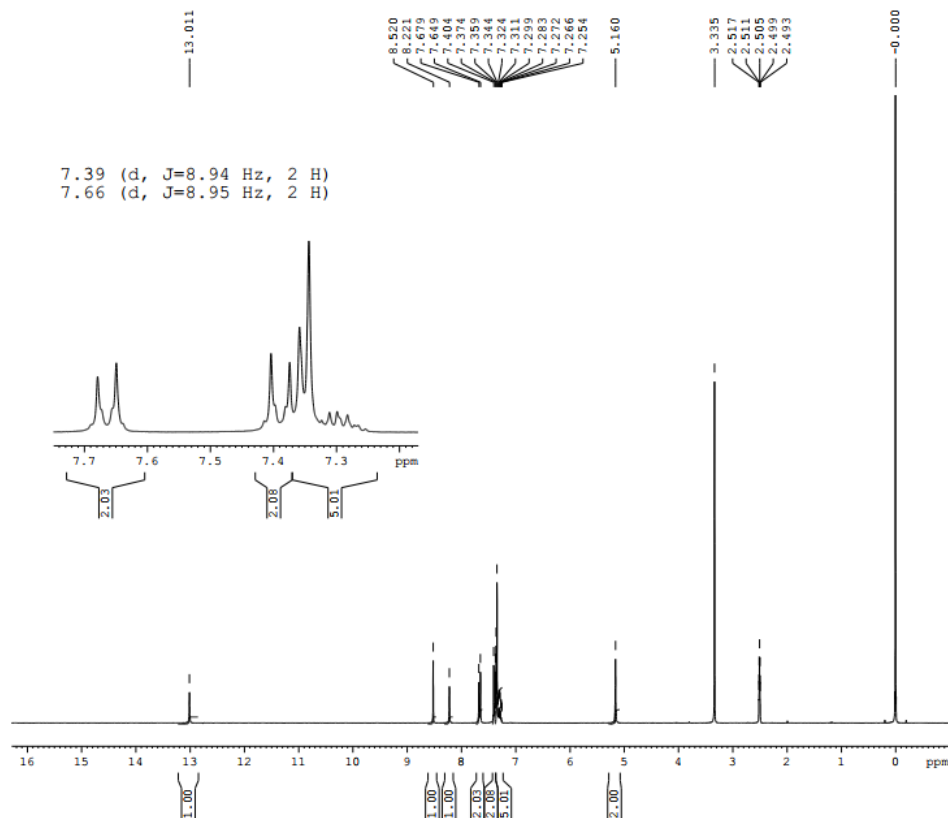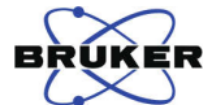

Current Data Parameters  
NAME JN208  
EXPNO 7  
PROCNO 1

F2 - Acquisition Parameters  
Date\_ 20210322  
Time 13.26  
INSTRUM FOURIER300  
PROBHD 5 mm DUL 13C-1  
PULPROG zg30  
TD 65536  
SOLVENT DMSO  
NS 16  
DS 2  
SWH 6103.516 Hz  
FIDRES 0.093132 Hz  
AQ 5.3687091 sec  
RG 120.379  
DW 81.920 usec  
DE 6.50 usec  
TE 298.2 K  
D1 1.0000000 sec  
TDO 1

----- CHANNEL f1 -----  
SFO1 300.1618536 MHz  
NUC1 1H  
P1 13.50 usec  
PLW1 9.30000019 W

F2 - Processing parameters  
SI 65536  
SF 300.1599986 MHz  
WDW EM  
SSB 0  
LB 0.30 Hz  
GB 0  
PC 1.00

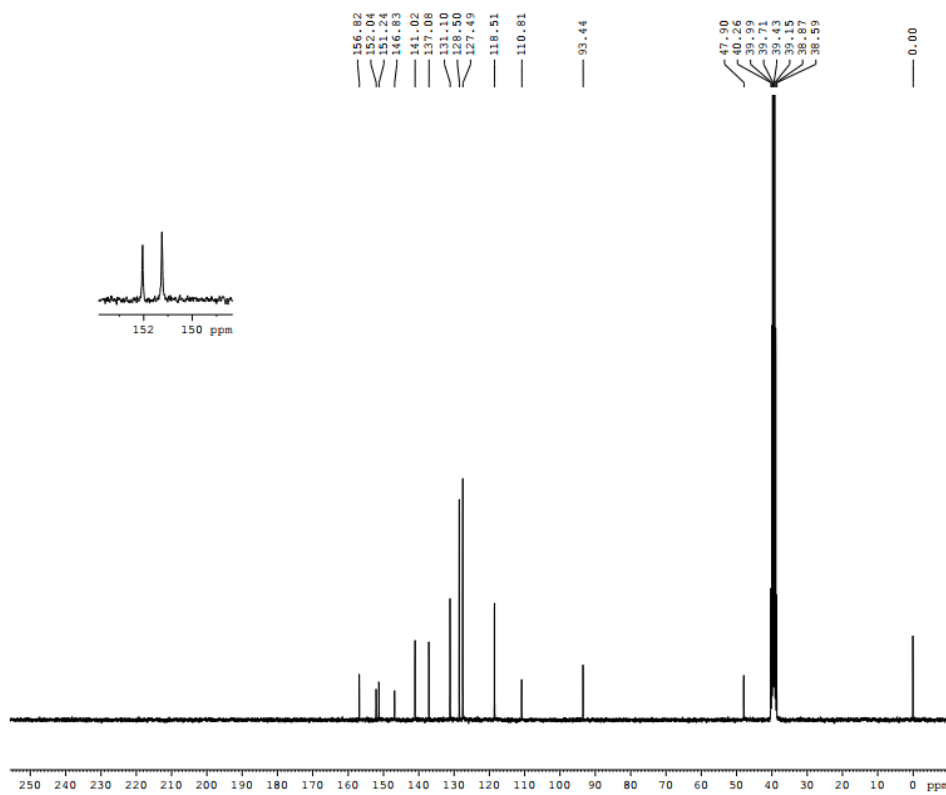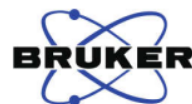

Current Data Parameters  
NAME JN208  
EXPNO 6  
PROCNO 1

F2 - Acquisition Parameters  
Date\_ 20210318  
Time\_ 5.41  
INSTRUM FOURIER300  
PROBHD 5 mm DUL 13C-1  
PULPROG zgpg30  
TD 65536  
SOLVENT DMSO  
NS 4096  
DS 4  
SWH 24414.063 Hz  
FIDRES 0.372529 Hz  
AQ 1.3421773 sec  
RG 501.187  
DW 20.480 usec  
DE 6.50 usec  
TE 298.3 K  
D1 2.0000000 sec  
D11 0.0300000 sec  
D31 0.00001300 sec  
D40 0.02898005 sec  
L4 40  
L5 57  
P32 90.00 usec  
TDO 4

----- CHANNEL f1 -----  
SFO1 75.4828392 MHz  
NUC1 13C  
P1 13.00 usec  
PLW1 22.00000000 W

----- CHANNEL f2 -----  
SFO2 300.1612006 MHz  
NUC2 1H  
CPDPRG[2] waltz16  
PCPD2 90.00 usec  
FLW2 9.30000019 W  
FLW12 0.25149000 W  
FLW13 0.12650000 W

F2 - Processing parameters  
SI 32768  
SF 75.4753339 MHz  
WDW EM  
SSB 0  
LB 1.00 Hz  
GB 0  
PC 1.40

# 5-Benzyl-3-(4-methylphenylamino)-1,5-dihydro-4H-pyrazolo[3,4-d]pyrimidin-4-one (4d)

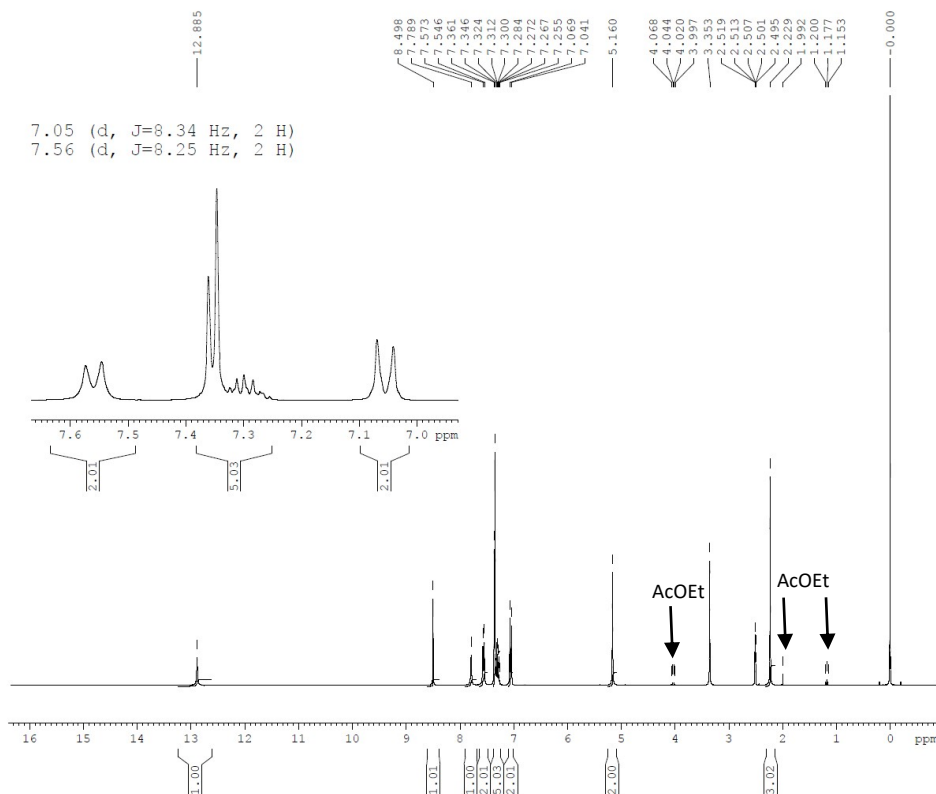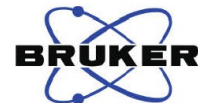

Current Data Parameters  
 NAME JN213  
 EXPNO 2  
 PROCNO 1

F2 - Acquisition Parameters  
 Date\_ 20210315  
 Time 14.01  
 INSTRUM FOURIER300  
 PROBHD 5 mm DUL 13C-1  
 PULPROG zg30  
 TD 65536  
 SOLVENT DMSO  
 NS 16  
 DS 2  
 SWH 6103.516 Hz  
 FIDRES 0.093132 Hz  
 AQ 5.3687091 sec  
 RG 52.7107  
 DW 81.920 usec  
 DE 6.50 usec  
 TE 298.2 K  
 D1 1.00000000 sec  
 TDO 1

==== CHANNEL f1 =====  
 SFO1 300.1618536 MHz  
 NUC1 1H  
 P1 13.50 usec  
 PLW1 9.30000019 W

F2 - Processing parameters  
 SI 65536  
 SF 300.1599979 MHz  
 WDW EM  
 SSB 0  
 LB 0.30 Hz  
 GB 0  
 PC 1.00

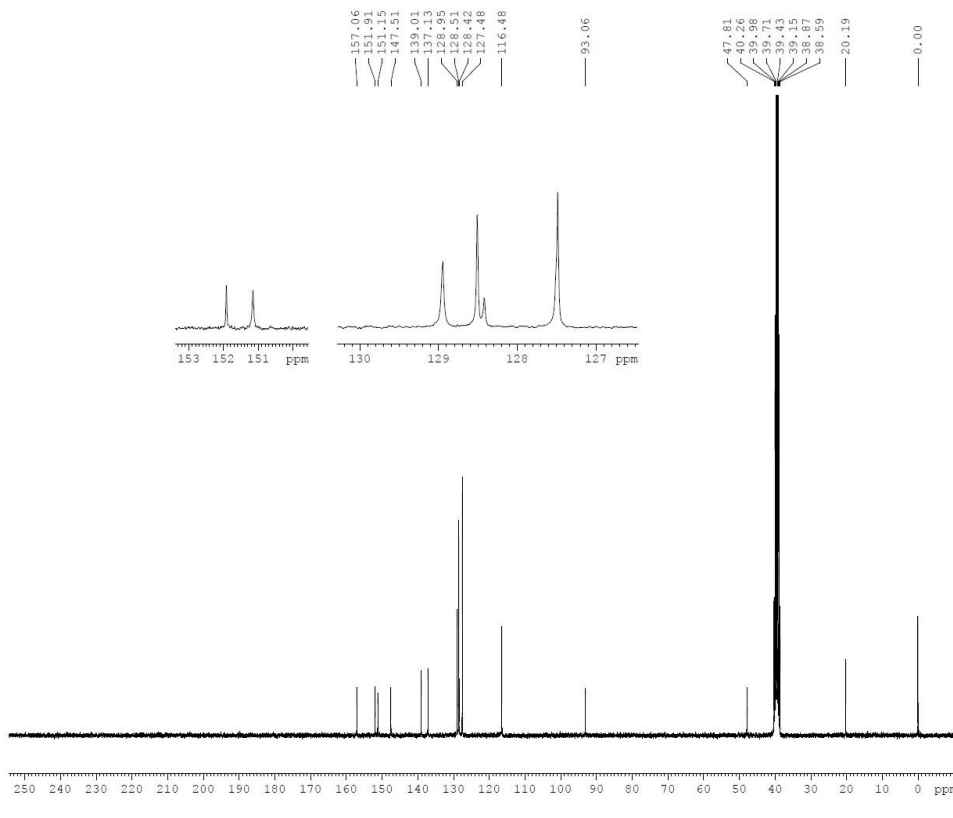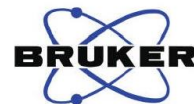

Current Data Parameters  
 NAME JN213  
 EXPNO 5  
 PROCNO 1

F2 - Acquisition Parameters  
 Date\_ 20210323  
 Time 0.04  
 INSTRUM FOURIER300  
 PROBHD 5 mm DUL 13C-1  
 PULPROG zgpg30  
 TD 65536  
 SOLVENT DMSO  
 NS 4096  
 DS 4  
 SWH 24414.063 Hz  
 FIDRES 0.372529 Hz  
 AQ 1.3421773 sec  
 RG 501.187  
 DW 20.480 usec  
 DE 6.50 usec  
 TE 298.3 K  
 D1 2.00000000 sec  
 D11 0.03000000 sec  
 D31 0.00001300 sec  
 D40 0.02898005 sec  
 I4 40  
 L5 57  
 P32 90.00 usec  
 TDO 4

==== CHANNEL f1 =====  
 SFO1 75.4828392 MHz  
 NUC1 13C  
 P1 13.00 usec  
 PLW1 22.00000000 W

==== CHANNEL f2 =====  
 SFO2 300.1612006 MHz  
 NUC2 1H  
 CPDPRG2 waltz16  
 PCPD2 90.00 usec  
 PLW2 9.30000019 W  
 PLW12 0.25149000 W  
 PLW13 0.12650000 W

F2 - Processing parameters  
 SI 32768  
 SF 75.4753337 MHz  
 WDW EM  
 SSB 0  
 LB 1.00 Hz  
 GB 0  
 PC 1.40

**5-Benzyl-3-(4-methoxyphenylamino)-1,5-dihydro-4H-pyrazolo[3,4-d]pyrimidin-4-one (4e)**

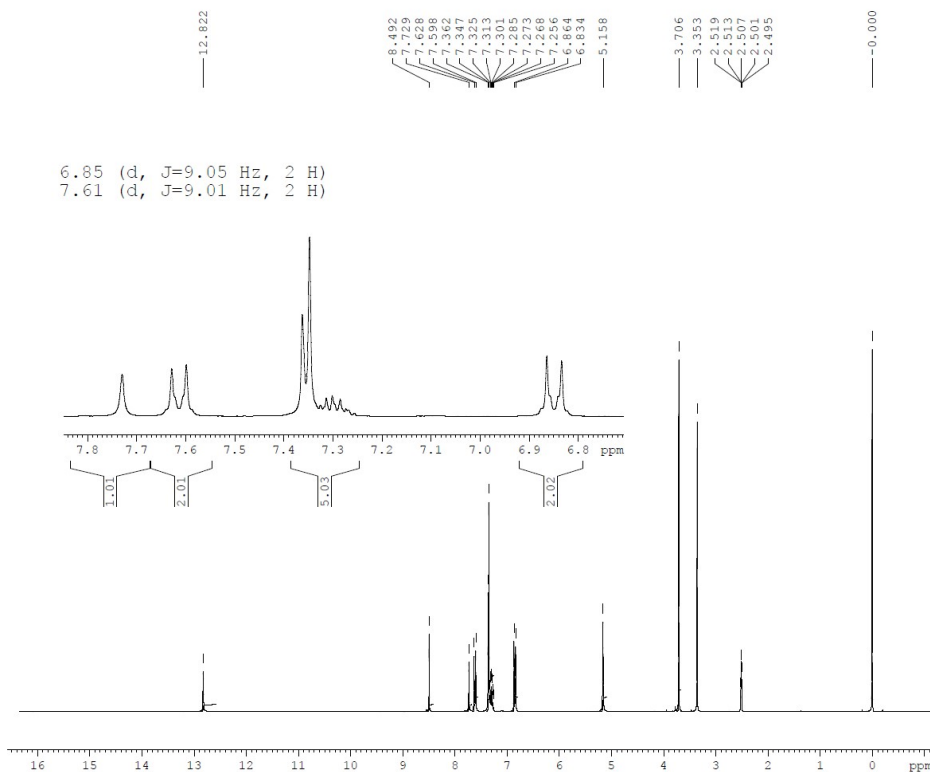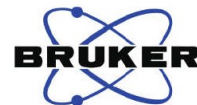

Current Data Parameters  
NAME JN219  
EXPNO 5  
PROCNO 1

F2 - Acquisition Parameters  
Date\_ 20210318  
Time\_ 13.41  
INSTRUM FOURIER300  
PROBHD 5 mm DUL 13C-1  
PULPROG zg30  
TD 65536  
SOLVENT DMSO  
NS 16  
DS 2  
SWH 6103.516 Hz  
FIDRES 0.093132 Hz  
AQ 5.3687091 sec  
RG 66.5041  
DW 81.920 usec  
DE 6.50 usec  
TE 298.2 K  
D1 1.00000000 sec  
TDO 1

==== CHANNEL f1 =====  
SF01 300.1618536 MHz  
NUC1 1H  
P1 13.50 usec  
PLW1 9.30000019 W

F2 - Processing parameters  
SI 65536  
SF 300.1599980 MHz  
WDW EM  
SSB 0  
LB 0.30 Hz  
GB 0  
PC 1.00

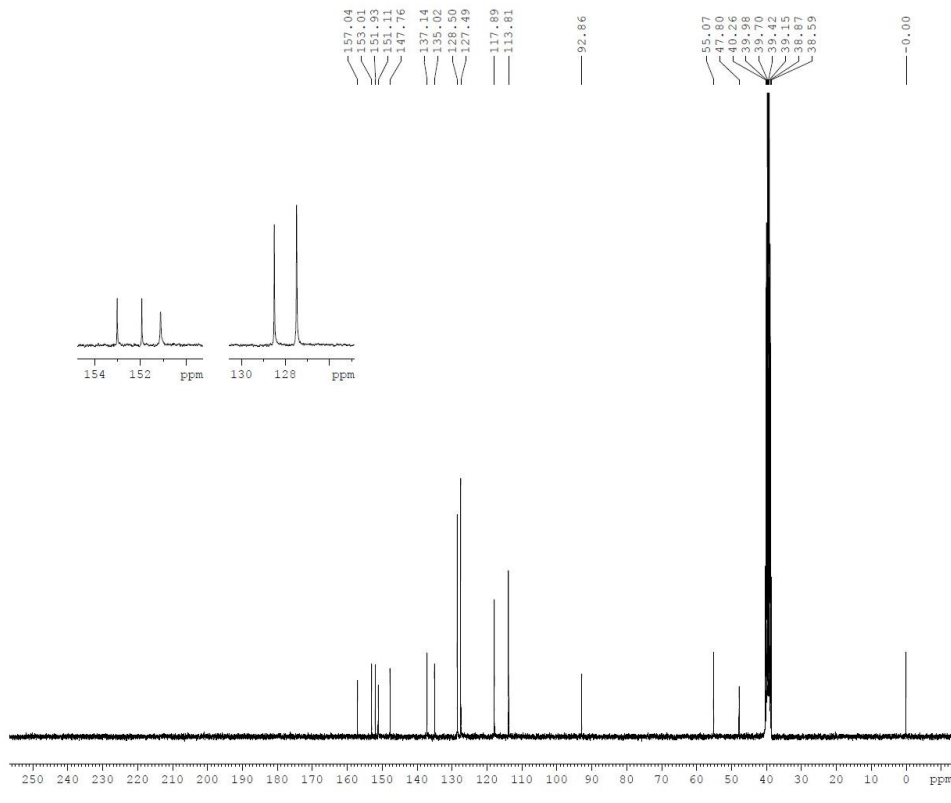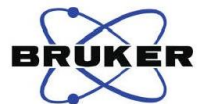

Current Data Parameters  
NAME JN219  
EXPNO 6  
PROCNO 1

F2 - Acquisition Parameters  
Date\_ 20210320  
Time\_ 9.36  
INSTRUM FOURIER300  
PROBHD 5 mm DUL 13C-1  
PULPROG zgpg30  
TD 65536  
SOLVENT DMSO  
NS 4096  
DS 4  
SWH 24414.063 Hz  
FIDRES 0.372529 Hz  
AQ 1.3421773 sec  
RG 501.137  
DW 20.480 usec  
DE 6.50 usec  
TE 298.3 K  
D1 2.00000000 sec  
D11 0.03000000 sec  
D31 0.00001300 sec  
D40 0.02898005 sec  
L4 40  
L5 57  
P32 90.00 usec  
TDO 4

==== CHANNEL f1 =====  
SF01 75.4828392 MHz  
NUC1 13C  
P1 13.00 usec  
PLW1 22.00000000 W

==== CHANNEL f2 =====  
SF02 300.1612006 MHz  
NUC2 1H  
CPDPRG[2] waltz16  
PCPD2 90.00 usec  
PLW2 9.30000019 W  
PLW12 0.25149000 W  
PLW13 0.12650000 W

F2 - Processing parameters  
SI 32768  
SF 75.4753339 MHz  
WDW EM  
SSB 0  
LB 1.00 Hz  
GB 0  
PC 1.40



3-(4-Bromophenylamino)-5-(4-fluorobenzyl)-1,5-dihydro-4H-pyrazolo[3,4-d]pyrimidin-4-one (4f)

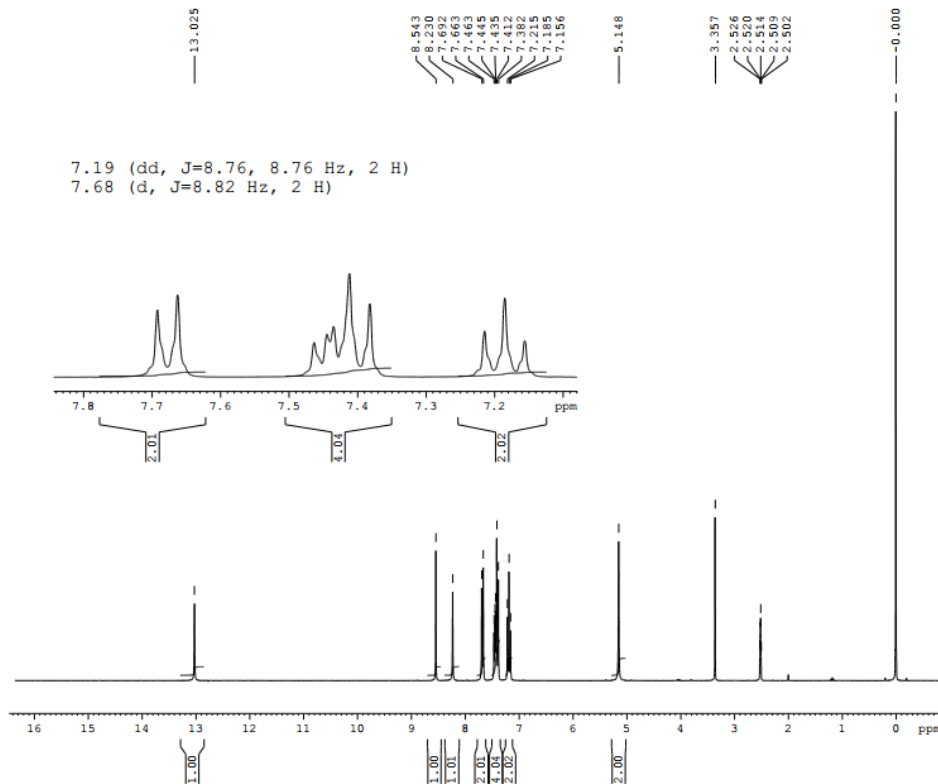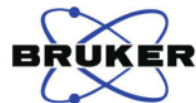

Current Data Parameters  
NAME JN209  
EXPNO 3  
PROCNO 1

F2 - Acquisition Parameters  
Date\_ 20210310  
Time 12.01  
INSTRUM FOURIER300  
PROBHD 5 mm DUL 13C-1  
PULPROG zg30  
TD 65536  
SOLVENT DMSO  
NS 16  
DS 2  
SWH 6103.516 Hz  
FIDRES 0.093132 Hz  
AQ 5.3687091 sec  
RG 73.8752  
DW 81.920 usec  
DE 6.50 usec  
TE 298.0 K  
D1 1.00000000 sec  
TD0 1

----- CHANNEL f1 -----  
SFO1 300.1618536 MHz  
NUC1 1H  
P1 13.50 usec  
PLW1 9.30000019 W

F2 - Processing parameters  
SI 65536  
SF 300.1599957 MHz  
WDW EM  
SSB 0  
LB 0.30 Hz  
GB 0  
PC 1.00

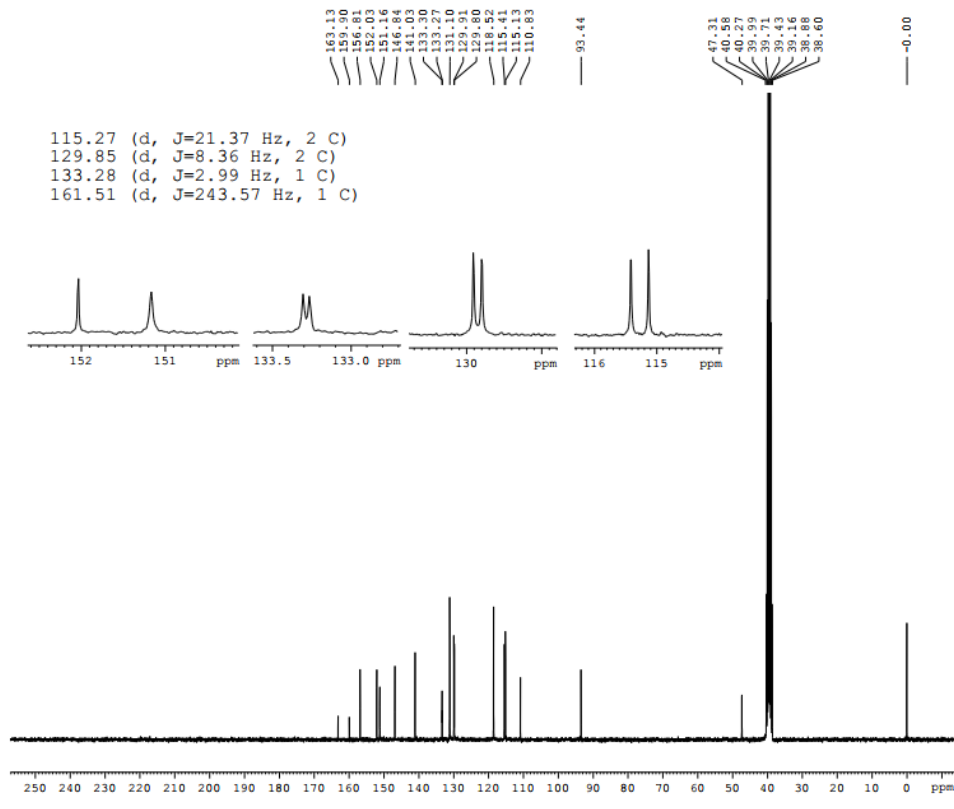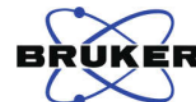

Current Data Parameters  
NAME JN209  
EXPNO 4  
PROCNO 1

F2 - Acquisition Parameters  
Date\_ 20210314  
Time 17.34  
INSTRUM FOURIER300  
PROBHD 5 mm DUL 13C-1  
PULPROG zgpg30  
TD 65536  
SOLVENT DMSO  
NS 5120  
DS 4  
SWH 24414.063 Hz  
FIDRES 0.372529 Hz  
AQ 1.3421773 sec  
RG 501.187  
DW 20.480 usec  
DE 6.50 usec  
TE 298.3 K  
D1 2.00000000 sec  
D11 0.03000000 sec  
D31 0.00001300 sec  
D40 0.02898005 sec  
L4 40  
L5 57  
P32 90.00 usec  
TD0 5

----- CHANNEL f1 -----  
SFO1 75.4828392 MHz  
NUC1 13C  
P1 13.00 usec  
PLW1 22.00000000 W

----- CHANNEL f2 -----  
SFO2 300.1612006 MHz  
NUC2 1H  
CPDPRG2 waltz16  
PCPD2 90.00 usec  
PLW2 9.30000019 W  
PLW12 0.25149000 W  
PLW13 0.12650000 W

F2 - Processing parameters  
SI 32768  
SF 75.4753331 MHz  
WDW EM  
SSB 0  
LB 1.00 Hz  
GB 0  
PC 1.40



**3-(4-Bromophenylamino)-5-(4-chlorobenzyl)-1,5-dihydro-4H-pyrazolo[3,4-d]pyrimidin-4-one (4g)**

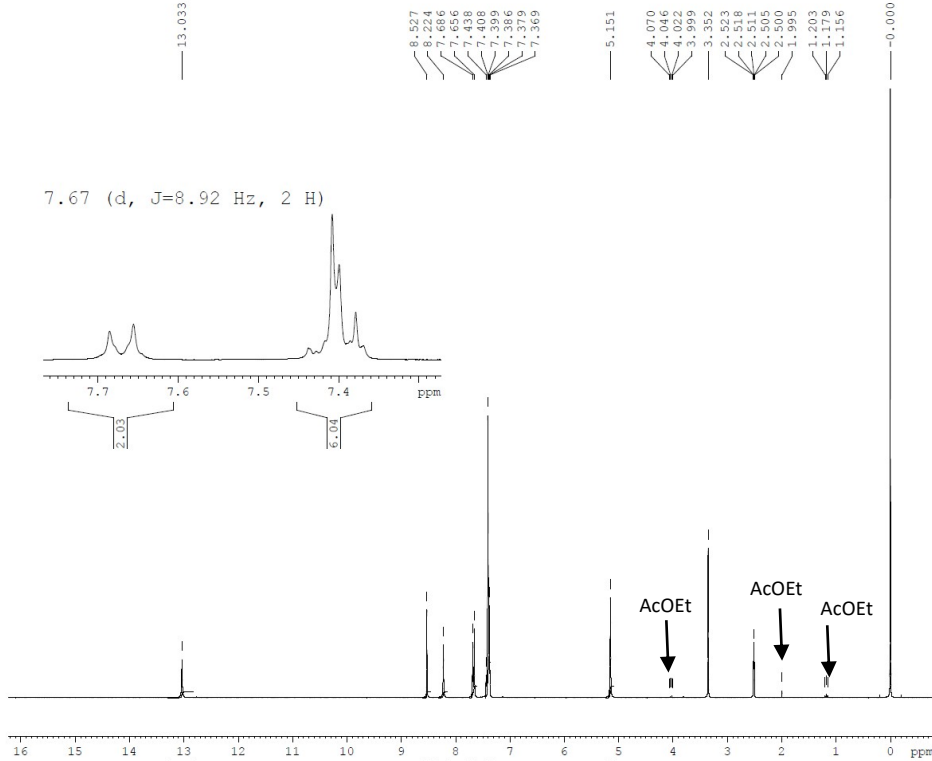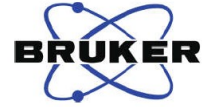

Current Data Parameters  
 NAME JN210  
 EXPNO 3  
 PROCNO 1

F2 - Acquisition Parameters  
 Date\_ 20210310  
 Time\_ 12.06  
 INSTRUM FOURIER300  
 PROBHD 5 mm DUL 13C-1  
 PULPROG zg30  
 TD 65536  
 SOLVENT DMSO  
 NS 16  
 DS 2  
 SWH 6103.516 Hz  
 FIDRES 0.093132 Hz  
 AQ 5.3687091 sec  
 RG 73.1933  
 DW 81.920 usec  
 DE 6.50 usec  
 TE 298.2 K  
 D1 1.0000000 sec  
 TDO 1

===== CHANNEL f1 =====  
 SFO1 300.1618536 MHz  
 NUC1 1H  
 P1 13.50 usec  
 PLW1 9.30000019 W

F2 - Processing parameters  
 SI 65536  
 SF 300.1599965 MHz  
 WDW EM  
 SSB 0  
 LB 0.30 Hz  
 GB 0  
 PC 1.00

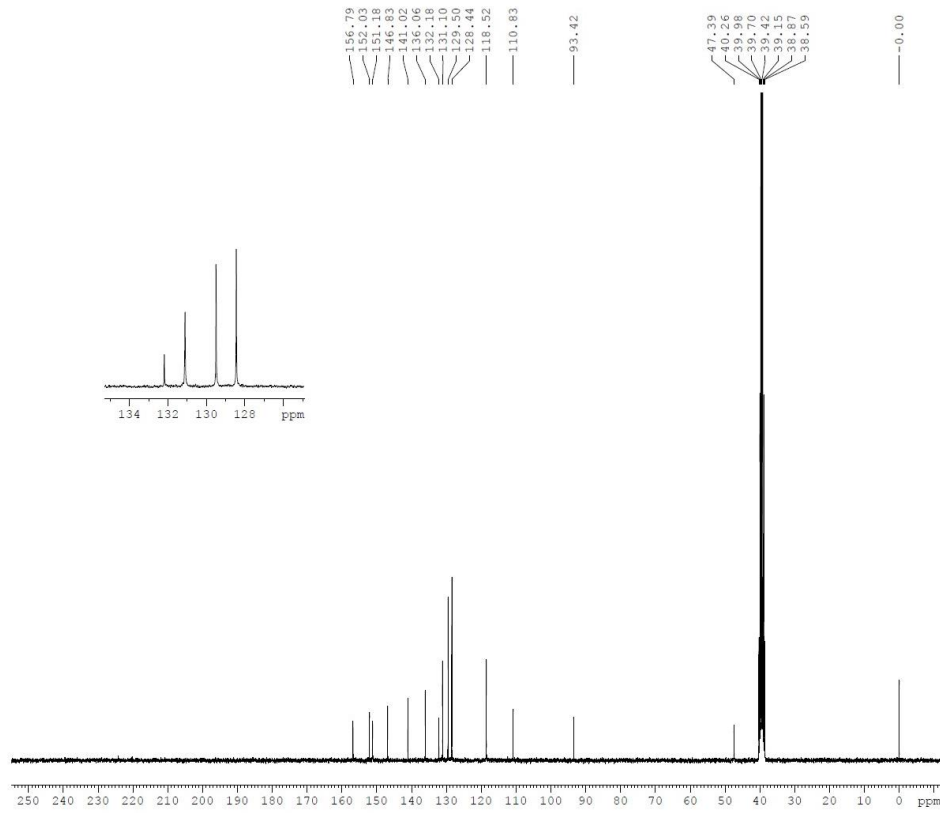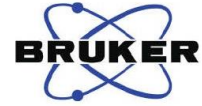

Current Data Parameters  
 NAME JN210  
 EXPNO 10  
 PROCNO 1

F2 - Acquisition Parameters  
 Date\_ 20210320  
 Time\_ 5.41  
 INSTRUM FOURIER300  
 PROBHD 5 mm DUL 13C-1  
 PULPROG zgpg30  
 TD 65536  
 SOLVENT DMSO  
 NS 4096  
 DS 4  
 SWH 24414.063 Hz  
 FIDRES 0.372529 Hz  
 AQ 1.3421773 sec  
 RG 501.187  
 DW 20.480 usec  
 DE 6.50 usec  
 TE 298.3 K  
 D1 2.0000000 sec  
 D11 0.0300000 sec  
 D31 0.00001300 sec  
 D40 0.02898005 sec  
 L4 40  
 L5 57  
 P32 90.0 usec  
 TDO 4

===== CHANNEL f1 =====  
 SFO1 75.4828392 MHz  
 NUC1 13C  
 P1 13.00 usec  
 PLW1 22.00000000 W

===== CHANNEL f2 =====  
 SFO2 300.1612006 MHz  
 NUC2 1H  
 CPDPRG2 waltz16  
 PCPFD2 90.00 usec  
 PLW2 9.30000019 W  
 PLW12 0.25149000 W  
 PLW13 0.12650000 W

F2 - Processing parameters  
 SI 32768  
 SF 75.4753336 MHz  
 WDW EM  
 SSB 0  
 LB 1.00 Hz  
 GB 0  
 PC 1.40

**3-(4-Bromophenylamino)-5-(4-methylbenzyl)-1,5-dihydro-4H-pyrazolo[3,4-d]pyrimidin-4-one (4h)**

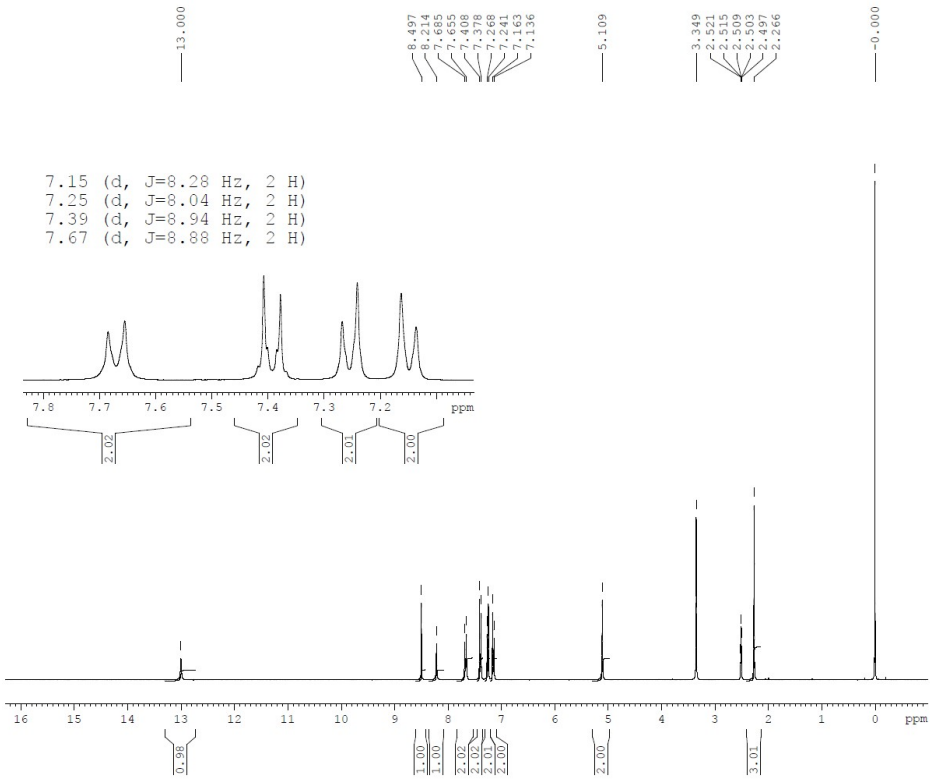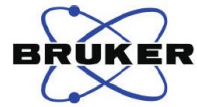

Current Data Parameters  
 NAME JN214  
 EXPNO 5  
 PROCNO 1

F2 - Acquisition Parameters  
 Date\_ 20210317  
 Time\_ 13.42  
 INSTRUM FOURIER300  
 PROBHD 5 mm DUL 13C-1  
 PULPROG zg30  
 TD 65536  
 SOLVENT DMSO  
 NS 16  
 DS 2  
 SWH 6103.516 Hz  
 FIDRES 0.093132 Hz  
 AQ 5.3687091 sec  
 RG 80.8202  
 DW 81.920 usec  
 DE 6.50 usec  
 TE 298.1 K  
 D1 1.00000000 sec  
 TD0 1

==== CHANNEL f1 =====  
 SFO1 300.1618536 MHz  
 NUC1 1H  
 P1 13.50 usec  
 PLW1 9.30000019 W

F2 - Processing parameters  
 SI 65536  
 SF 300.1599973 MHz  
 WDW EM  
 SSB 0  
 LB 0.30 Hz  
 GB 0  
 PC 1.00

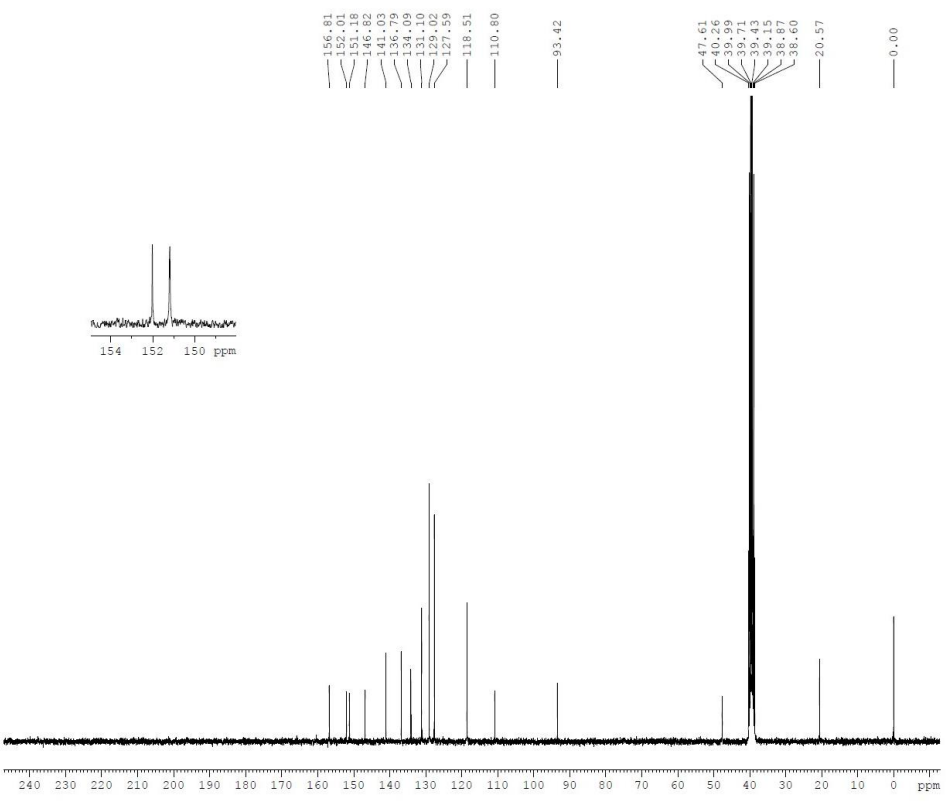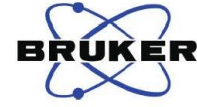

Current Data Parameters  
 NAME JN214  
 EXPNO 6  
 PROCNO 1

F2 - Acquisition Parameters  
 Date\_ 20210313  
 Time\_ 9.36  
 INSTRUM FOURIER300  
 PROBHD 5 mm DUL 13C-1  
 PULPROG zgpg30  
 TD 65536  
 SOLVENT DMSO  
 NS 4096  
 DS 4  
 SWH 24414.063 Hz  
 FIDRES 0.1372529 Hz  
 AQ 1.3421773 sec  
 RG 501.187  
 DW 20.480 usec  
 DE 6.50 usec  
 TE 298.3 K  
 D1 2.00000000 sec  
 D11 0.03000000 sec  
 D31 0.00001300 sec  
 D40 0.02898005 sec  
 L4 40  
 L5 57  
 P32 90.00 usec  
 TD0 4

==== CHANNEL f1 =====  
 SFO1 75.4828392 MHz  
 NUC1 13C  
 P1 13.00 usec  
 PLW1 22.00000000 W

==== CHANNEL f2 =====  
 SFO2 300.1612006 MHz  
 NUC2 1H  
 CPDPRG2 waltz16  
 PCPD2 90.00 usec  
 PLW2 9.30000019 W  
 PLW12 0.25149000 W  
 PLW13 0.12650000 W

F2 - Processing parameters  
 SI 32768  
 SF 75.4753339 MHz  
 WDW EM  
 SSB 0  
 LB 1.00 Hz  
 GB 0  
 PC 1.40

**3-(4-Chlorophenylamino)-5-(4-picoyl)-1,5-dihydro-4H-pyrazolo[3,4-d]pyrimidin-4-one (4i)**

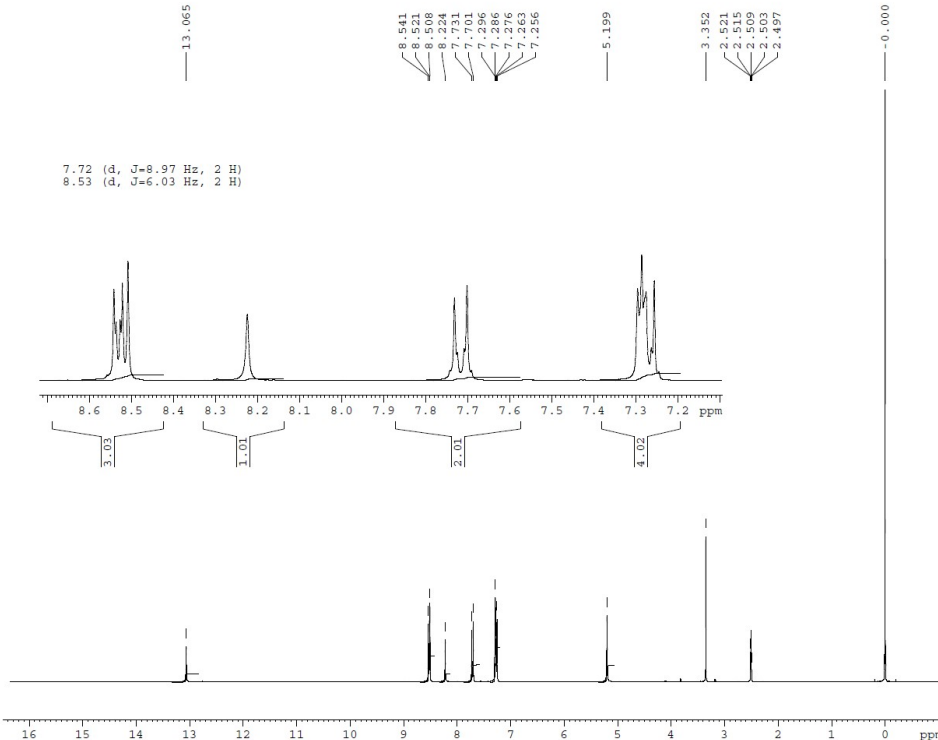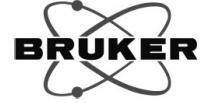

Current Data Parameters  
 NAME JN221  
 EXPNO 3  
 PROCNO 1

F2 - Acquisition Parameters  
 Date\_ 20210921  
 Time 12.10  
 INSTRUM FOURIER300  
 PROBHD 5 mm DUL 13C-1  
 PULPROG zg30  
 TD 65536  
 SOLVENT DMSO  
 NS 16  
 DS 2  
 SWH 6103.516 Hz  
 FIDRES 0.093132 Hz  
 AQ 5.3687091 sec  
 RG 67.4741  
 DW 81.920 usec  
 DE 6.50 usec  
 TE 298.3 K  
 D1 1.00000000 sec  
 TDO 1

===== CHANNEL f1 =====  
 SFO1 300.1618536 MHz  
 NUC1 1H  
 P1 13.50 usec  
 PLW1 9.30000019 W

F2 - Processing parameters  
 SI 65536  
 SF 300.1599972 MHz  
 WDW EM  
 SSB 0  
 LB 0.30 Hz  
 GB 0  
 PC 1.00

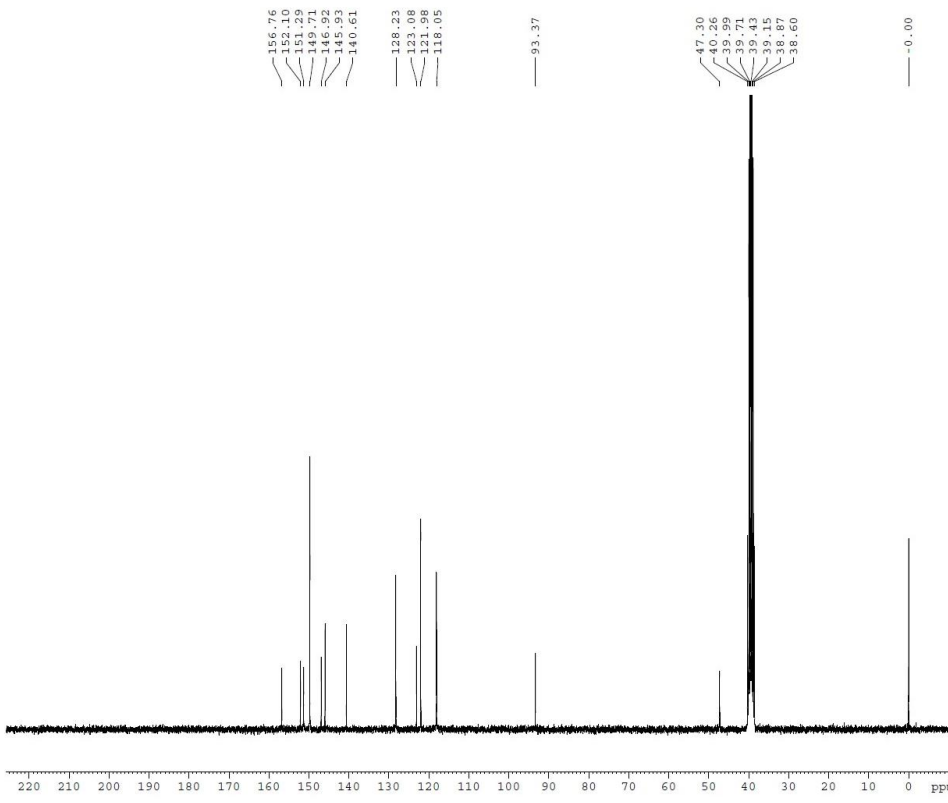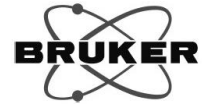

Current Data Parameters  
 NAME JN221  
 EXPNO 4  
 PROCNO 1

F2 - Acquisition Parameters  
 Date\_ 20210922  
 Time 5.04  
 INSTRUM FOURIER300  
 PROBHD 5 mm DUL 13C-1  
 PULPROG zgpg30  
 TD 65536  
 SOLVENT DMSO  
 NS 3072  
 DS 4  
 SWH 24414.063 Hz  
 FIDRES 0.372529 Hz  
 AQ 1.3421773 sec  
 RG 501.187  
 DW 20.480 usec  
 DE 6.50 usec  
 TE 298.3 K  
 D1 2.00000000 sec  
 D11 0.03000000 sec  
 D31 0.00001300 sec  
 D40 0.02898005 sec  
 L4 40  
 L5 57  
 P32 90.00 usec  
 TDO 3

===== CHANNEL f1 =====  
 SFO1 75.4828992 MHz  
 NUC1 13C  
 P1 13.00 usec  
 PLW1 22.00000000 W

===== CHANNEL f2 =====  
 SFO2 300.1612006 MHz  
 NUC2 1H  
 CPDPRG2 waltz16  
 PCPD2 90.00 usec  
 PLW2 9.30000019 W  
 PLW12 0.25149000 W  
 PLW13 0.12650000 W

F2 - Processing parameters  
 SI 32768  
 SF 75.4753337 MHz  
 WDW EM  
 SSB 0  
 LB 1.00 Hz  
 GB 0  
 PC 1.40

**3-(4-Bromophenylamino)-5-(4-picoly)-1,5-dihydro-4H-pyrazolo[3,4-d]pyrimidin-4-one (4j)**

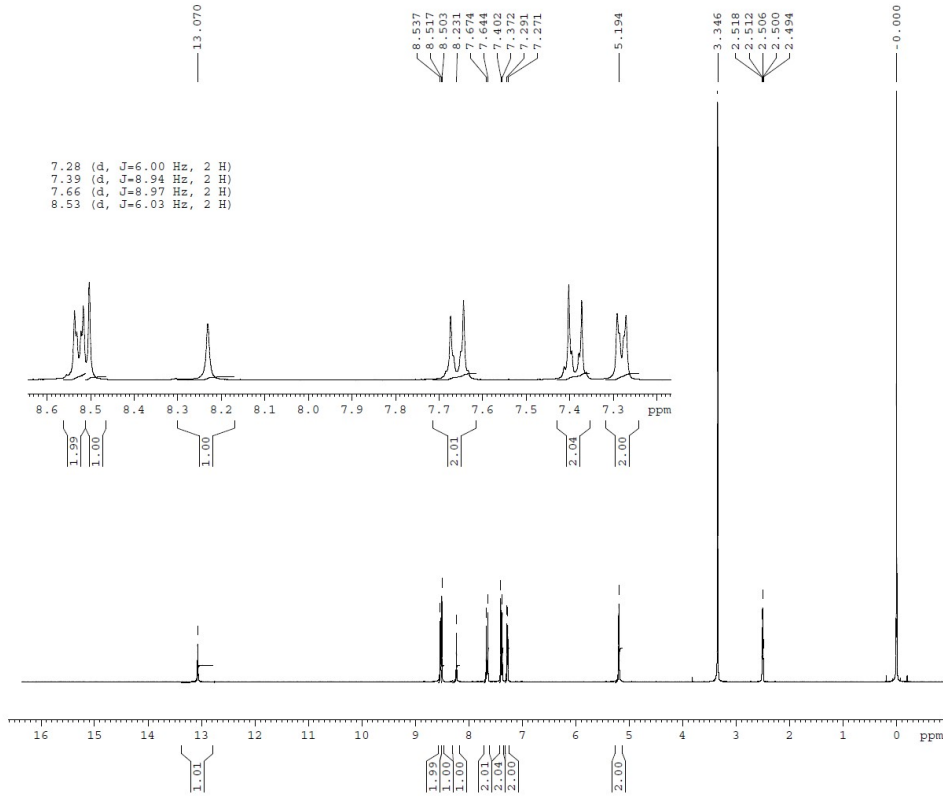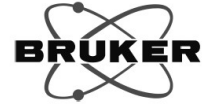

Current Data Parameters  
NAME JN222  
EXPNO 3  
PROCNO 1

F2 - Acquisition Parameters  
Date\_ 20210921  
Time\_ 12.14  
INSTRUM FOURIER300  
PROBHD 5 mm DUL 13C-1  
PULPROG zg30  
TD 65536  
SOLVENT DMSO  
NS 16  
DS 2  
SWH 6103.516 Hz  
FIDRES 0.093132 Hz  
AQ 5.3687091 sec  
RG 79.1896  
DW 81.920 usec  
DE 6.50 usec  
TE 298.2 K  
D1 1.0000000 sec  
TDO 1

==== CHANNEL f1 =====  
SFO1 300.1618536 MHz  
NUC1 1H  
P1 13.50 usec  
PLW1 9.30000019 W

F2 - Processing parameters  
SI 65536  
SF 300.1599982 MHz  
WDW EM  
SSB 0  
LB 0.30 Hz  
GB 0  
PC 1.00

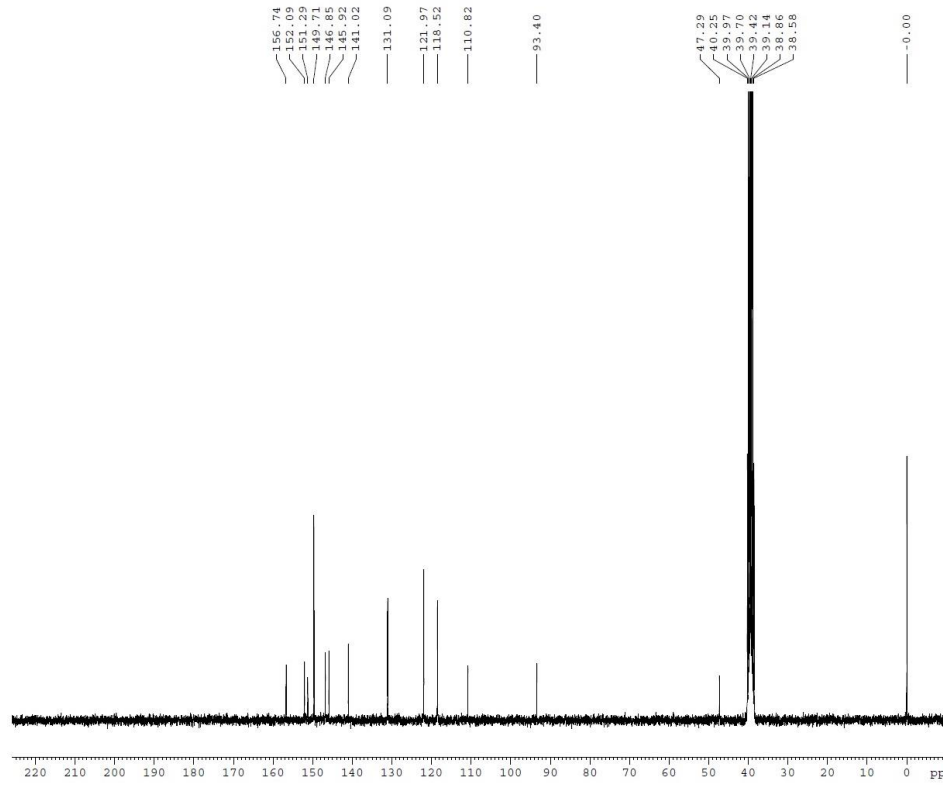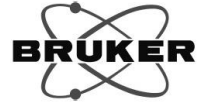

Current Data Parameters  
NAME JN222  
EXPNO 4  
PROCNO 1

F2 - Acquisition Parameters  
Date\_ 20210922  
Time\_ 11.21  
INSTRUM FOURIER300  
PROBHD 5 mm DUL 13C-1  
PULPROG zgpg30  
TD 65536  
SOLVENT DMSO  
NS 3072  
DS 4  
SWH 24414.063 Hz  
FIDRES 0.372529 Hz  
AQ 1.3421773 sec  
RG 501.187  
DW 20.480 usec  
DE 6.50 usec  
TE 298.3 K  
D1 2.0000000 sec  
D11 0.0300000 sec  
D31 0.00001300 sec  
D40 0.02898005 sec  
L4 40  
L5 57  
P32 90.00 usec  
TDO 3

==== CHANNEL f1 =====  
SFO1 75.4828992 MHz  
NUC1 13C  
P1 13.00 usec  
PLW1 22.00000000 W

==== CHANNEL f2 =====  
SFO2 300.1612006 MHz  
NUC2 1H  
CPDPRG2 waltz16  
PCPD2 90.00 usec  
PLW2 9.30000019 W  
PLW12 0.25149000 W  
PLW13 0.12650000 W

F2 - Processing parameters  
SI 32768  
SF 75.4753343 MHz  
WDW EM  
SSB 0  
LB 1.00 Hz  
GB 0  
PC 1.40

### 3-(4-Methylphenylamino)-5-(4-picolyl)-1,5-dihydro-4H-pyrazolo[3,4-d]pyrimidin-4-one (4k)

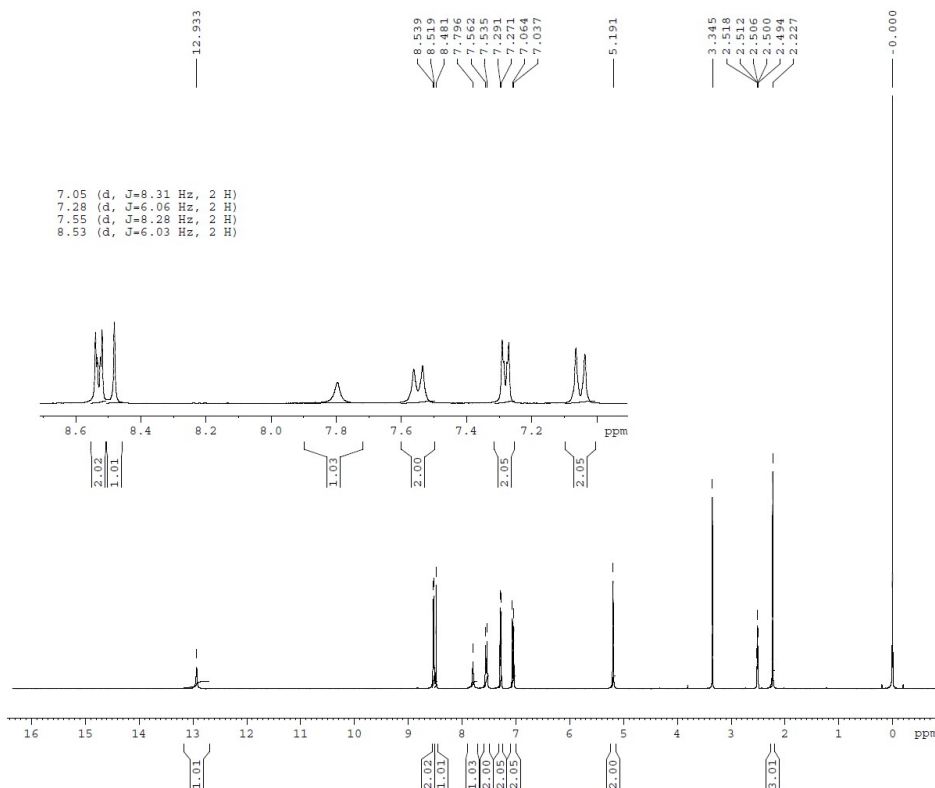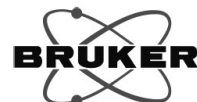

Current Data Parameters  
 NAME JN130  
 EXPNO 4  
 PROCNO 1

F2 - Acquisition Parameters  
 Date\_ 20210921  
 Time 12.05  
 INSTRUM FOURIER300  
 PROBHD 5 mm DUL 13C-1  
 PULPROG zg30  
 TD 65536  
 SOLVENT DMSO  
 NS 16  
 DS 2  
 SWH 6103.516 Hz  
 FIDRES 0.093132 Hz  
 AQ 5.3687091 sec  
 RG 75.762  
 DW 81.920 usec  
 DE 6.50 usec  
 TE 298.2 K  
 D1 1.0000000 sec  
 TDO 1

===== CHANNEL f1 =====  
 SFO1 300.1618536 MHz  
 NUC1 1H  
 P1 13.50 usec  
 PLW1 9.3000019 W

F2 - Processing parameters  
 SI 65536  
 SF 300.1599981 MHz  
 WDW EM  
 SSB 0  
 LB 0.30 Hz  
 GB 0  
 PC 1.00

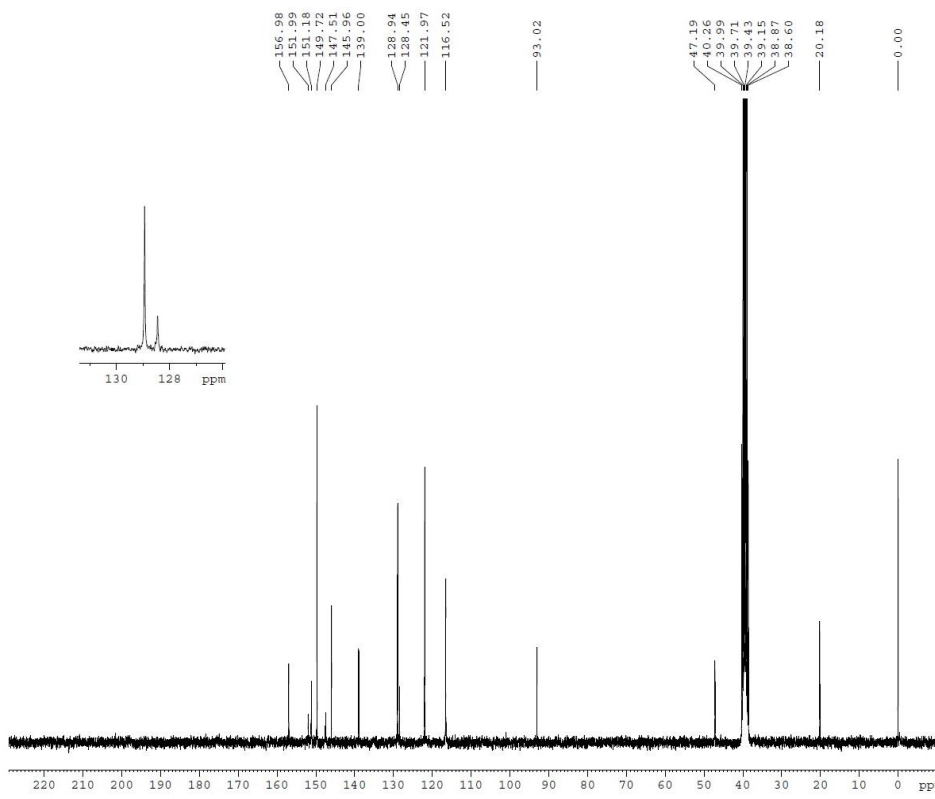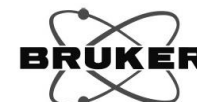

Current Data Parameters  
 NAME JN130  
 EXPNO 5  
 PROCNO 1

F2 - Acquisition Parameters  
 Date\_ 20210922  
 Time 2.04  
 INSTRUM FOURIER300  
 PROBHD 5 mm DUL 13C-1  
 PULPROG zgpg30  
 TD 65536  
 SOLVENT DMSO  
 NS 4  
 DS 4  
 SWH 24414.063 Hz  
 FIDRES 0.372529 Hz  
 AQ 1.3421773 sec  
 RG 501.187  
 DW 20.480 usec  
 DE 6.50 usec  
 TE 298.3 K  
 D1 2.0000000 sec  
 D11 0.0300000 sec  
 D31 0.00001300 sec  
 D40 0.02898005 sec  
 L4 40  
 L5 57  
 P32 90.00 usec  
 TDO 3

===== CHANNEL f1 =====  
 SFO1 75.4828392 MHz  
 NUC1 13C  
 P1 13.00 usec  
 PLW1 22.0000000 W

===== CHANNEL f2 =====  
 SFO2 300.1612006 MHz  
 NUC2 1H  
 CPDPRG[2] waltz16  
 PCPD2 90.00 usec  
 PLW2 9.3000019 W  
 PLW12 0.25149000 W  
 PLW13 0.12650000 W

F2 - Processing parameters  
 SI 32768  
 SF 75.4753339 MHz  
 WDW EM  
 SSB 0  
 LB 1.00 Hz  
 GB 0  
 PC 1.40

**3-(4-Bromophenylamino)-5-(4-phenethyl)-1,5-dihydro-4H-pyrazolo[3,4-d]pyrimidin-4-one (4I)**

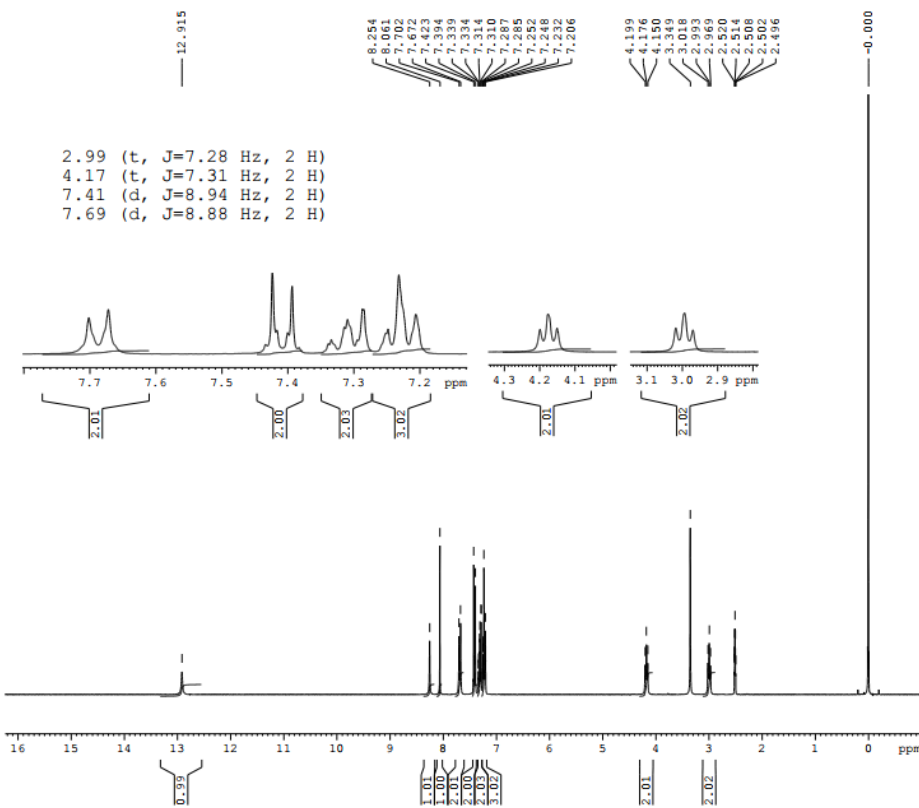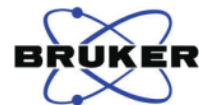

Current Data Parameters  
 NAME JN220  
 EXPNO 5  
 PROCNO 1

F2 - Acquisition Parameters  
 Date\_ 20210319  
 Time 14.54  
 INSTRUM FOURIER300  
 PROBHD 5 mm DUL 13C-1  
 PULPROG zg30  
 TD 65536  
 SOLVENT DMSO  
 NS 16  
 DS 2  
 SWH 6103.516 Hz  
 FIDRES 0.093132 Hz  
 AQ 5.3687091 sec  
 RG 56.008  
 DW 81.920 usec  
 DE 6.50 usec  
 TE 298.2 K  
 D1 1.0000000 sec  
 TD0 1

----- CHANNEL f1 -----  
 SFO1 300.1618536 MHz  
 NUC1 1H  
 P1 13.50 usec  
 PLW1 9.3000019 W

F2 - Processing parameters  
 SI 65536  
 SF 300.1599976 MHz  
 WDW EM  
 SSB 0  
 LB 0.30 Hz  
 GB 0  
 PC 1.00

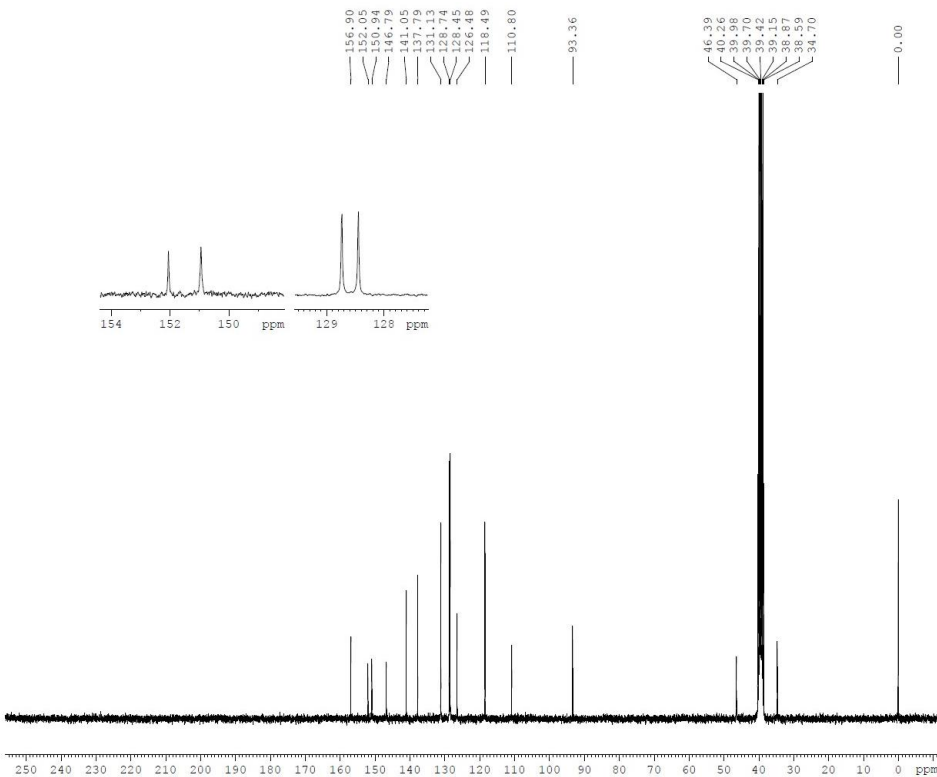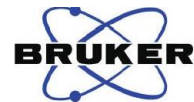

Current Data Parameters  
 NAME JN220  
 EXPNO 6  
 PROCNO 1

F2 - Acquisition Parameters  
 Date\_ 20210321  
 Time 22.04  
 INSTRUM FOURIER300  
 PROBHD 5 mm DUL 13C-1  
 PULPROG zgpg30  
 TD 65536  
 SOLVENT DMSO  
 NS 4096  
 DS 4  
 SWH 24414.063 Hz  
 FIDRES 0.372529 Hz  
 AQ 1.3421773 sec  
 RG 501.187  
 DW 20.480 usec  
 DE 6.50 usec  
 TE 298.3 K  
 D1 2.0000000 sec  
 D11 0.0300000 sec  
 D12 0.0000130 sec  
 D40 0.0288005 sec  
 L4 40  
 L5 57  
 P32 90.00 usec  
 TD0 4

===== CHANNEL f1 =====  
 SFO1 75.4828392 MHz  
 NUC1 13C  
 P1 13.00 usec  
 PLW1 22.0000000 W

===== CHANNEL f2 =====  
 SFO2 300.1612006 MHz  
 NUC2 1H  
 CPDPRG[2] waltz16  
 PCPD2 90.00 usec  
 PLW2 9.3000019 W  
 PLW12 0.25149000 W  
 PLW13 0.12650000 W

F2 - Processing parameters  
 SI 32768  
 SF 75.4753339 MHz  
 WDW EM  
 SSB 0  
 LB 1.00 Hz  
 GB 0  
 PC 1.40



3-(4-Bromophenylamino)-5-(4-methylphenyl)-1,5-dihydro-4H-pyrazolo[3,4-d]pyrimidin-4-one (4m)

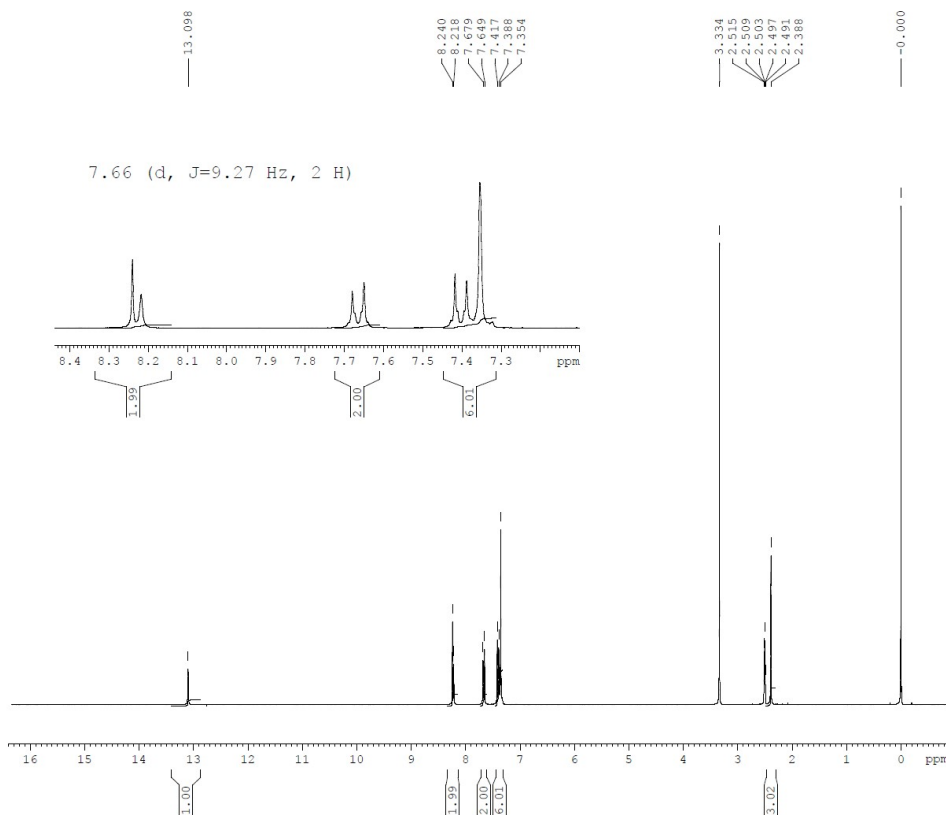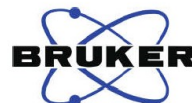

Current Data Parameters  
 NAME JN216  
 EXPNO 5  
 PROCNO 1

F2 - Acquisition Parameters  
 Date\_ 20210318  
 Time\_ 13.31  
 INSTRUM FOURIER300  
 PROBHD 5 mm DUL 13C-1  
 PULPROG zg30  
 TD 65536  
 SOLVENT DMSO  
 NS 16  
 DS 2  
 SWH 6103.516 Hz  
 FIDRES 0.093132 Hz  
 AQ 5.3687091 sec  
 RG 120.156  
 DW 81.920 usec  
 DE 6.50 usec  
 TE 298.2 K  
 D1 1.00000000 sec  
 TDO 1

===== CHANNEL f1 =====  
 SFO1 300.1618536 MHz  
 NUC1 1H  
 P1 13.50 usec  
 PLW1 9.30000019 W

F2 - Processing parameters  
 SI 65536  
 SF 300.1599994 MHz  
 WDW EM  
 SSB 0  
 LB 0.30 Hz  
 GB 0  
 PC 1.00

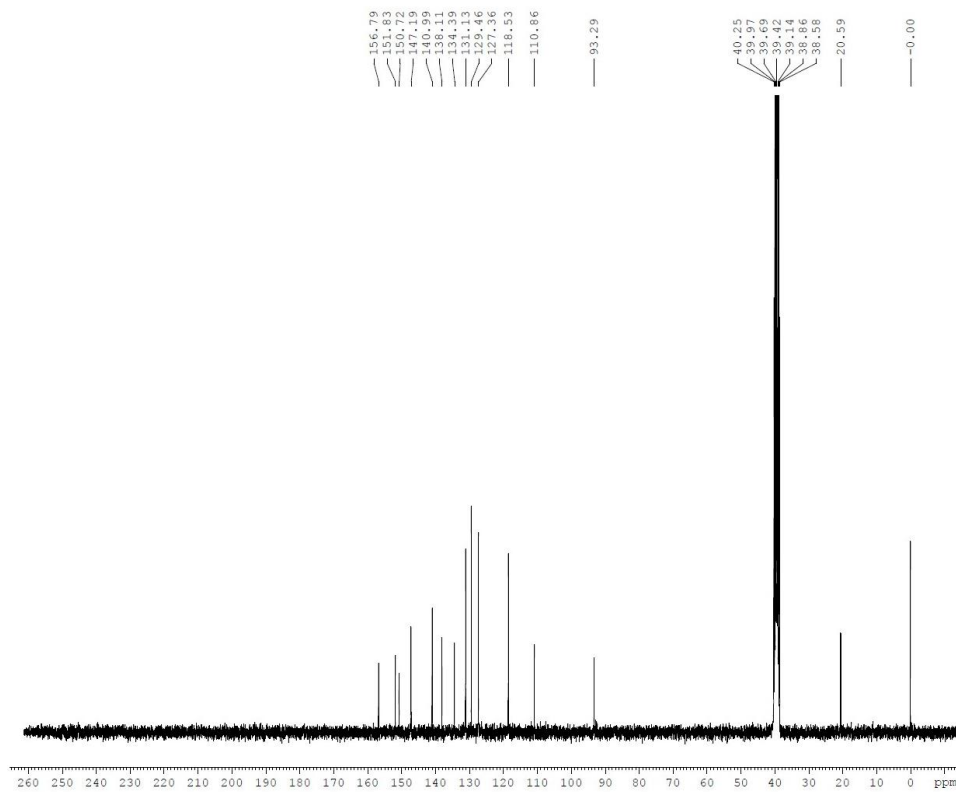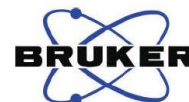

Current Data Parameters  
 NAME JN216  
 EXPNO 4  
 PROCNO 1

F2 - Acquisition Parameters  
 Date\_ 20210323  
 Time\_ 4.04  
 INSTRUM FOURIER300  
 PROBHD 5 mm DUL 13C-1  
 PULPROG zgpg30  
 TD 65536  
 SOLVENT DMSO  
 NS 4096  
 DS 4  
 SWH 24414.063 Hz  
 FIDRES 0.372529 Hz  
 AQ 1.3421773 sec  
 RG 501.187  
 DW 20.480 usec  
 DE 6.50 usec  
 TE 298.3 K  
 D1 2.00000000 sec  
 D11 0.330000000 sec  
 D31 0.00001300 sec  
 D40 0.02898005 sec  
 L4 40  
 L5 57  
 P32 90.00 usec  
 TDO 4

===== CHANNEL f1 =====  
 SFO1 75.4828392 MHz  
 NUC1 13C  
 P1 13.00 usec  
 PLW1 22.00000000 W

===== CHANNEL f2 =====  
 SFO2 300.1612006 MHz  
 NUC2 1H  
 CPDPRG2 waltz16  
 PCPD2 90.00 usec  
 PLW2 9.30000019 W  
 PLW12 0.25149000 W  
 PLW13 0.12650000 W

F2 - Processing parameters  
 SI 32768  
 SF 75.4753347 MHz  
 WDW EM  
 SSB 0  
 LB 1.00 Hz  
 GB 0  
 PC 1.40

5-(4-Methoxyphenyl)-3-phenylamino-1,5-dihydro-4H-pyrazolo[3,4-d]pyrimidin-4-one (4n)

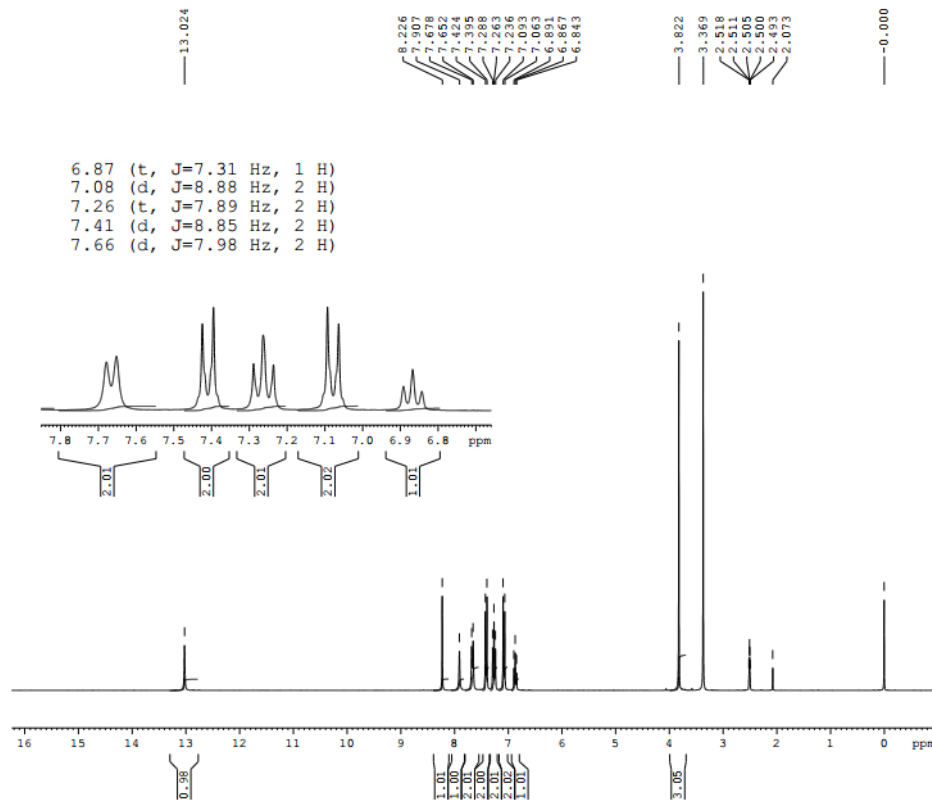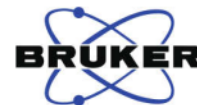

Current Data Parameters  
 NAME JN123  
 EXPNO 21  
 PROCNO 1

F2 - Acquisition Parameters  
 Date\_ 20201016  
 Time 10.16  
 INSTRUM FOURIER300  
 PROBHD 5 mm DUL 13C-1  
 PULPROG zg30  
 TD 65536  
 SOLVENT DMSO  
 NS 16  
 DS 2  
 SWH 6103.516 Hz  
 FIDRES 0.093132 Hz  
 AQ 5.3687091 sec  
 RG 31.623  
 DW 81.920 usec  
 DE 6.50 usec  
 TE 298.2 K  
 D1 1.00000000 sec  
 TD0 1

----- CHANNEL f1 -----  
 SFO1 300.1618536 MHz  
 NUC1 1H  
 P1 13.50 usec  
 PLW1 9.30000019 W

F2 - Processing parameters  
 SI 65536  
 SF 300.1599983 MHz  
 WDW EM  
 SSB 0  
 LB 0.30 Hz  
 GB 0  
 PC 1.00

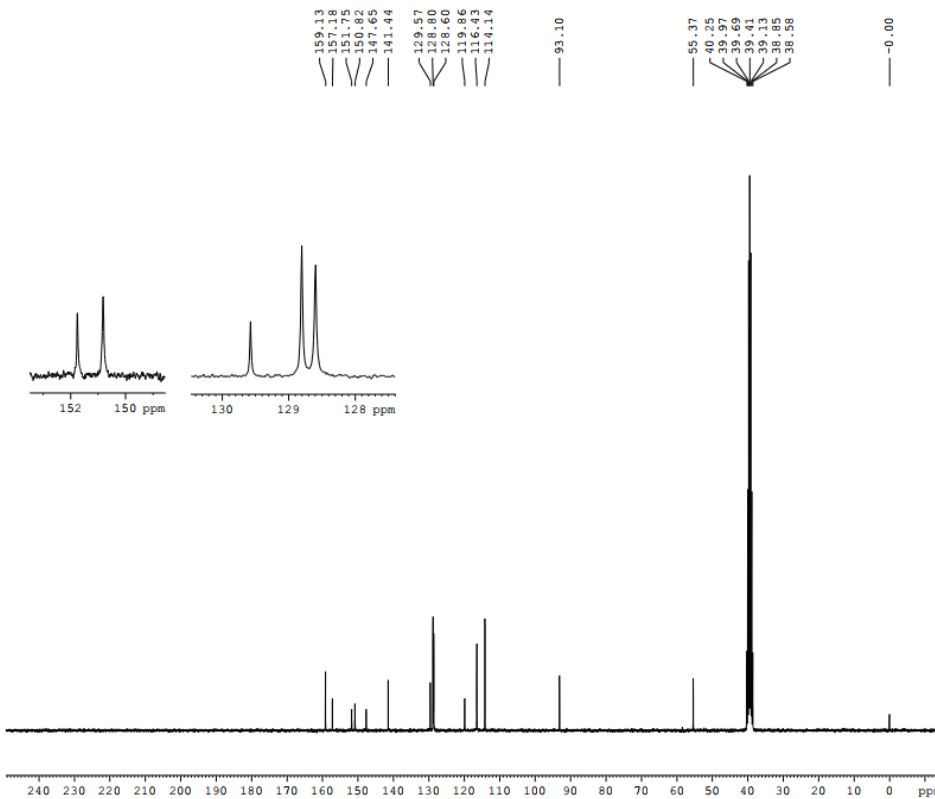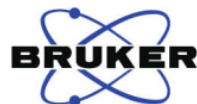

Current Data Parameters  
 NAME JN123  
 EXPNO 22  
 PROCNO 1

F2 - Acquisition Parameters  
 Date\_ 20201016  
 Time 10.25  
 INSTRUM FOURIER300  
 PROBHD 5 mm DUL 13C-1  
 PULPROG zgpg30  
 TD 65536  
 SOLVENT DMSO  
 NS 3072  
 DS 4  
 SWH 24414.063 Hz  
 FIDRES 0.372529 Hz  
 AQ 1.3421773 sec  
 RG 501.187  
 DW 20.480 usec  
 DE 6.50 usec  
 TE 298.3 K  
 D1 2.00000000 sec  
 D11 0.03000000 sec  
 D31 0.00001300 sec  
 D40 0.02898005 sec  
 L4 40  
 L5 57  
 P32 90.00 usec  
 TD0 3

----- CHANNEL f1 -----  
 SFO1 75.4828392 MHz  
 NUC1 13C  
 P1 13.00 usec  
 PLW1 22.00000000 W

----- CHANNEL f2 -----  
 SFO2 300.1612006 MHz  
 NUC2 1H  
 CPDPRG2 waltz16  
 FCF2 90.00 usec  
 PLW2 9.30000019 W  
 PLW12 0.25149000 W  
 PLW13 0.12650000 W

F2 - Processing parameters  
 SI 32768  
 SF 75.4753338 MHz  
 WDW EM  
 SSB 0  
 LB 1.00 Hz  
 GB 0  
 PC 1.40



3-(4-Chlorophenylamino)-5-(4-methoxyphenyl)-1,5-dihydro-4H-pyrazolo[3,4-d]pyrimidin-4-one (4o)

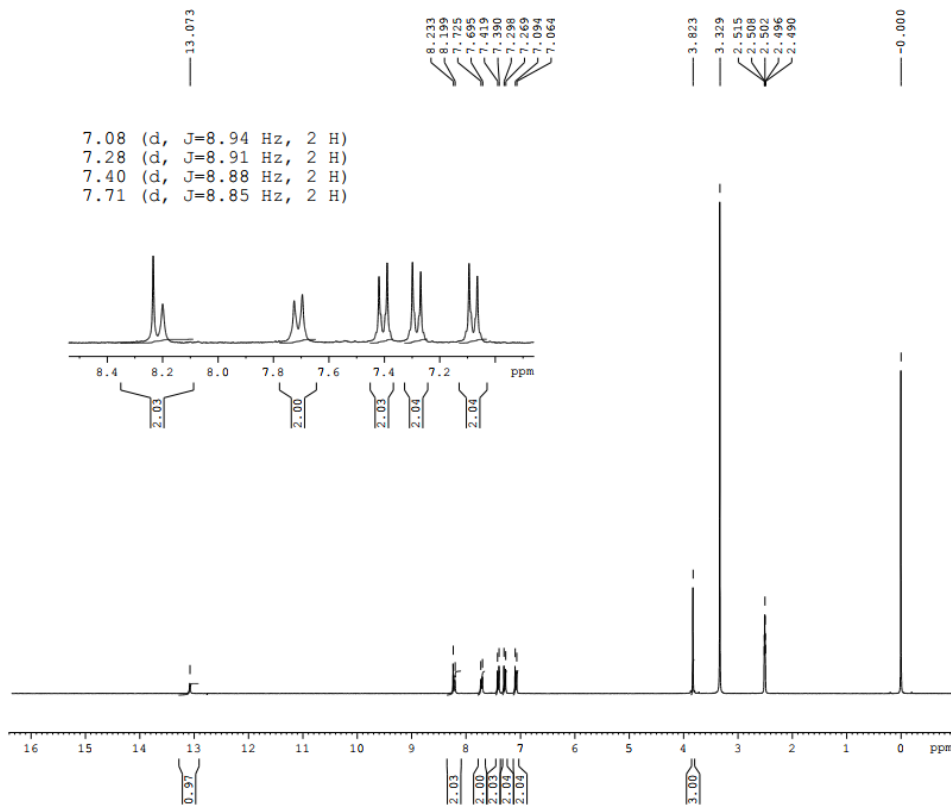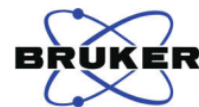

Current Data Parameters  
 NAME JN122  
 EXPNO 4  
 PROCNO 1

F2 - Acquisition Parameters  
 Date\_ 20200915  
 Time 10.08  
 INSTRUM FOURIER300  
 PROBHD 5 mm DUL 13C-1  
 PULPROG zg30  
 TD 65536  
 SOLVENT DMSO  
 NS 16  
 DS 2  
 SWH 6103.516 Hz  
 FIDRES 0.093132 Hz  
 AQ 5.3687091 sec  
 RG 151.731  
 DW 81.920 usec  
 DE 6.50 usec  
 TE 298.2 K  
 D1 1.00000000 sec  
 TD0 1

===== CHANNEL f1 =====  
 SFO1 300.1618536 MHz  
 NUC1 1H  
 P1 13.50 usec  
 PLW1 9.30000019 W

F2 - Processing parameters  
 SI 65536  
 SF 300.1599994 MHz  
 WDW EM  
 SSB 0  
 LB 0.30 Hz  
 GB 0  
 PC 1.00

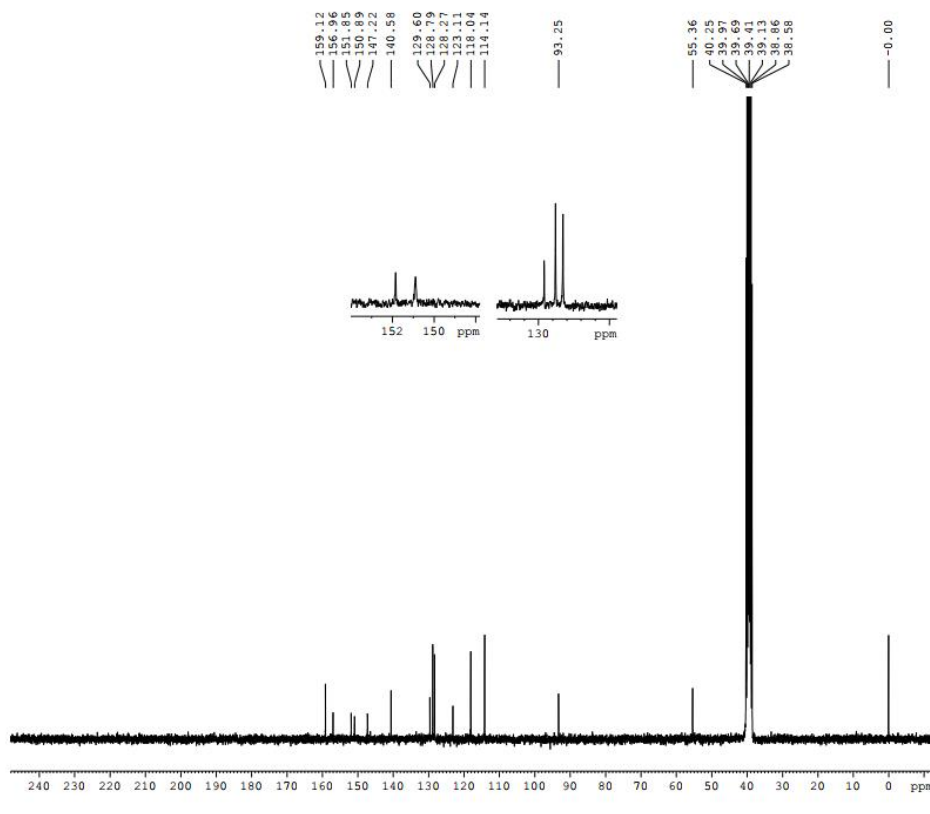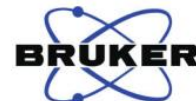

Current Data Parameters  
 NAME JN122  
 EXPNO 6  
 PROCNO 1

F2 - Acquisition Parameters  
 Date\_ 20200917  
 Time 18.05  
 INSTRUM FOURIER300  
 PROBHD 5 mm DUL 13C-1  
 PULPROG zgpg30  
 TD 65536  
 SOLVENT DMSO  
 NS 12288  
 DS 4  
 SWH 24414.063 Hz  
 FIDRES 0.372529 Hz  
 AQ 1.3421773 sec  
 RG 501.187  
 DW 20.480 usec  
 DE 6.50 usec  
 TE 298.2 K  
 D1 2.00000000 sec  
 D11 0.03000000 sec  
 D31 0.00001300 sec  
 D40 0.02898005 sec  
 L4 40  
 L5 57  
 P32 90.00 usec  
 TD0 12

===== CHANNEL f1 =====  
 SFO1 75.4828392 MHz  
 NUC1 13C  
 P1 13.00 usec  
 PLW1 22.00000000 W

===== CHANNEL f2 =====  
 SFO2 300.1612006 MHz  
 NUC2 1H  
 CPDPRG2 waltz16  
 PCPD2 90.00 usec  
 PLW2 9.30000019 W  
 PLW12 0.25149000 W  
 PLW13 0.12650000 W

F2 - Processing parameters  
 SI 32768  
 SF 75.4753350 MHz  
 WDW EM  
 SSB 0  
 LB 1.00 Hz  
 GB 0  
 PC 1.40

3-(4-Bromophenylamino)-5-(4-methoxyphenyl)-1,5-dihydro-4H-pyrazolo[3,4-d]pyrimidin-4-one (4p)

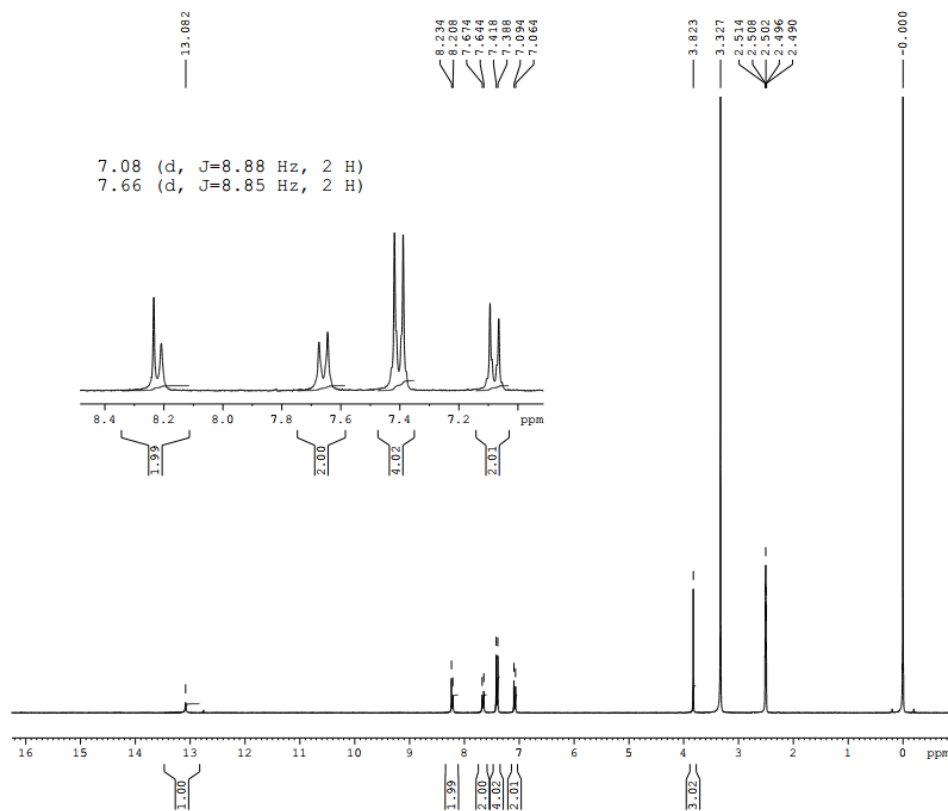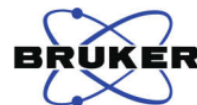

Current Data Parameters  
 NAME JN204  
 EXPNO 5  
 PROCNO 1

F2 - Acquisition Parameters  
 Date\_ 20210323  
 Time 11.41  
 INSTRUM FOURIER300  
 PROBHD 5 mm DUL 13C-1  
 PULPROG zg30  
 TD 65536  
 SOLVENT DMSO  
 NS 16  
 DS 2  
 SWH 6103.516 Hz  
 FIDRES 0.093132 Hz  
 AQ 5.3687091 sec  
 RG 160.971  
 DW 81.920 usec  
 DE 6.50 usec  
 TE 297.3 K  
 D1 1.00000000 sec  
 TD0 1

===== CHANNEL f1 =====  
 SF01 300.1618536 MHz  
 NUC1 1H  
 P1 13.50 usec  
 PLW1 9.30000019 W

F2 - Processing parameters  
 SI 65536  
 SF 300.1599994 MHz  
 WDW EM  
 SSB 0  
 LB 0.30 Hz  
 GB 0  
 PC 1.00

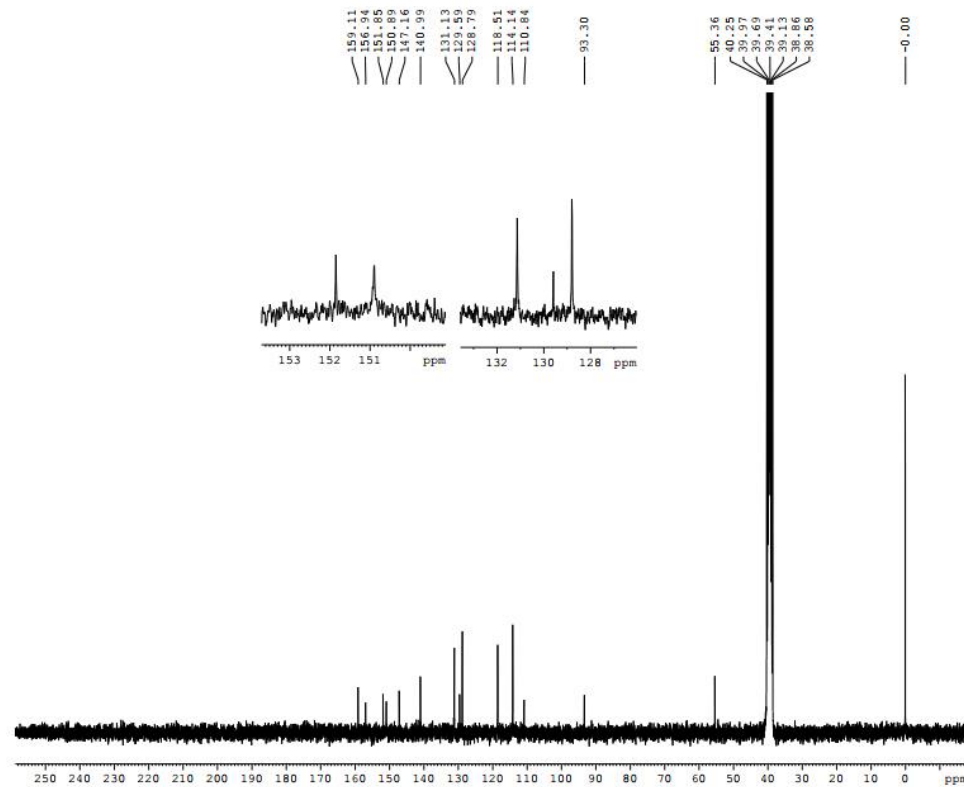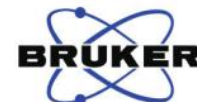

Current Data Parameters  
 NAME JN204  
 EXPNO 6  
 PROCNO 1

F2 - Acquisition Parameters  
 Date\_ 20210323  
 Time 18.05  
 INSTRUM FOURIER300  
 PROBHD 5 mm DUL 13C-1  
 PULPROG zgpg30  
 TD 65536  
 SOLVENT DMSO  
 NS 12288  
 DS 4  
 SWH 24414.063 Hz  
 FIDRES 0.372529 Hz  
 AQ 1.3421773 sec  
 RG 501.187  
 DW 20.480 usec  
 DE 6.50 usec  
 TE 298.2 K  
 D1 2.00000000 sec  
 D11 0.03000000 sec  
 D31 0.00001300 sec  
 D40 0.02898005 sec  
 L4 40  
 L5 57  
 F32 90.00 usec  
 TD0 12

----- CHANNEL f1 -----  
 SF01 75.4828392 MHz  
 NUC1 13C  
 P1 13.00 usec  
 PLW1 22.00000000 W

----- CHANNEL f2 -----  
 SF02 300.1612006 MHz  
 NUC2 1H  
 CPDPRG[2] waltz16  
 PCPD2 90.00 usec  
 PLM2 9.30000019 W  
 PLW12 0.25149000 W  
 PLW13 0.12650000 W

F2 - Processing parameters  
 SI 32768  
 SF 75.4753352 MHz  
 WDW EM  
 SSB 0  
 LB 1.00 Hz  
 GB 0  
 PC 1.40

5-(4-Methoxyphenyl)-3-(3-methylphenylamino)-1,5-dihydro-4H-pyrazolo[3,4-d]pyrimidin-4-one (4q)

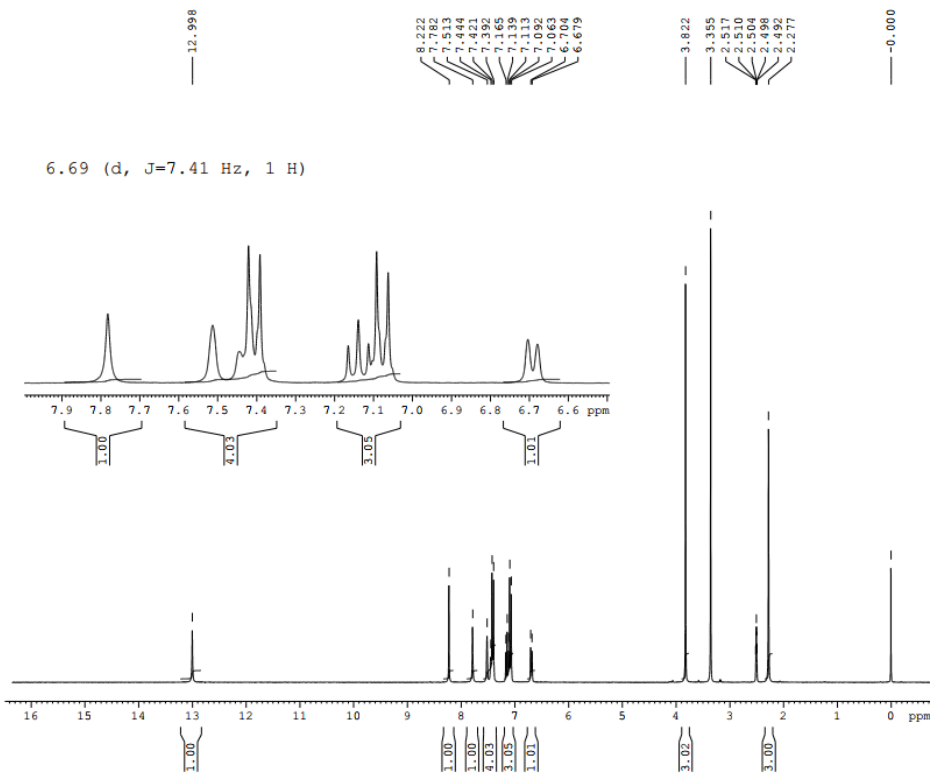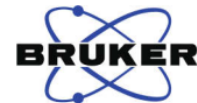

Current Data Parameters  
 NAME JN203  
 EXPNO 2  
 PROCNO 1

F2 - Acquisition Parameters  
 Date\_ 20210304  
 Time 14.38  
 INSTRUM FOURIER300  
 PROBHD 5 mm DUL 13C-1  
 PULPROG zg30  
 TD 65536  
 SOLVENT DMSO  
 NS 16  
 DS 2  
 SWH 6103.516 Hz  
 FIDRES 0.093132 Hz  
 AQ 5.3687091 sec  
 RG 56.2431  
 DW 81.920 usec  
 DE 6.50 usec  
 TE 298.1 K  
 D1 1.00000000 sec  
 TDO 1

===== CHANNEL f1 =====  
 SFO1 300.1618536 MHz  
 NUC1 1H  
 P1 13.50 usec  
 PLW1 9.30000019 W

F2 - Processing parameters  
 SI 65536  
 SF 300.1599988 MHz  
 WDW EM  
 SSB 0  
 LB 0.30 Hz  
 GB 0  
 PC 1.00

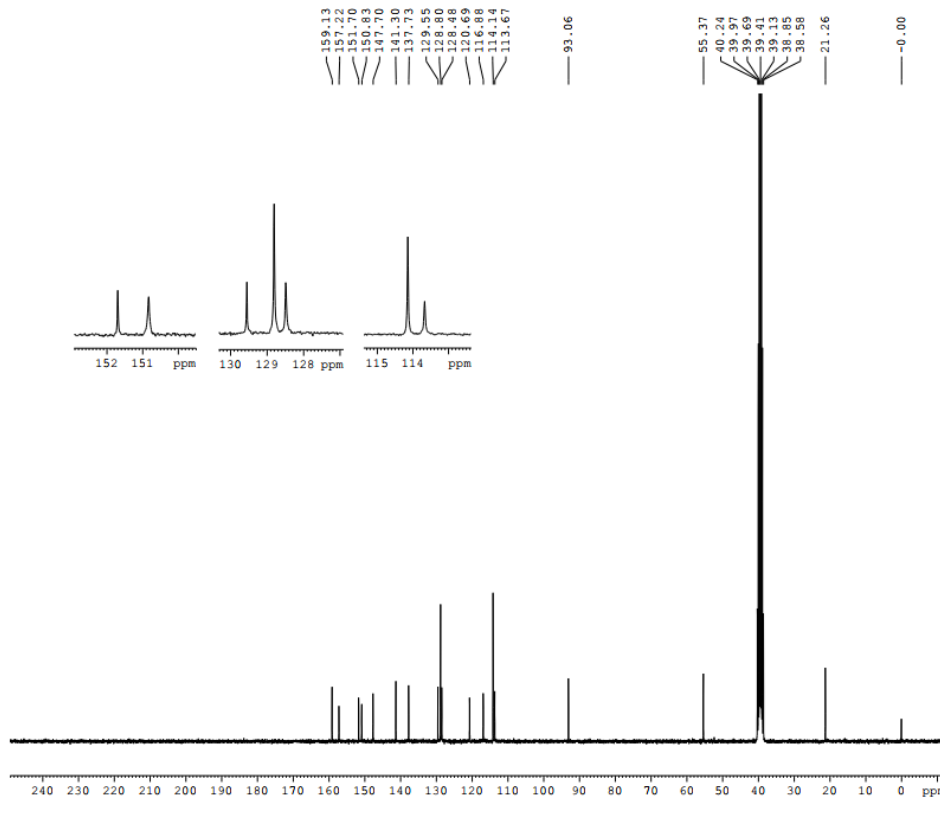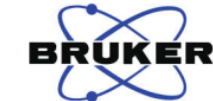

Current Data Parameters  
 NAME JN203  
 EXPNO 4  
 PROCNO 1

F2 - Acquisition Parameters  
 Date\_ 20210314  
 Time 12.08  
 INSTRUM FOURIER300  
 PROBHD 5 mm DUL 13C-1  
 PULPROG zgpg30  
 TD 65536  
 SOLVENT DMSO  
 NS 5120  
 DS 4  
 SWH 24414.063 Hz  
 FIDRES 0.372529 Hz  
 AQ 1.3421773 sec  
 RG 501.187  
 DW 20.480 usec  
 DE 6.50 usec  
 TE 298.3 K  
 D1 2.00000000 sec  
 D11 0.03000000 sec  
 D31 0.00001300 sec  
 D40 0.02898005 sec  
 L4 40  
 L5 57  
 P32 90.00 usec  
 TDO 5

===== CHANNEL f1 =====  
 SFO1 75.4828392 MHz  
 NUC1 13C  
 P1 13.00 usec  
 PLW1 22.00000000 W

===== CHANNEL f2 =====  
 SFO2 300.1612006 MHz  
 NUC2 1H  
 CPDPRG2 waltz16  
 PCPD2 90.00 usec  
 PLW2 9.30000019 W  
 PLW12 0.25149000 W  
 PLW13 0.12650000 W

F2 - Processing parameters  
 SI 32768  
 SF 75.4753339 MHz  
 WDW EM  
 SSB 0  
 LB 1.00 Hz  
 GB 0  
 PC 1.40

5-(4-Methoxyphenyl)-3-(4-methylphenylamino)-1,5-dihydro-4H-pyrazolo[3,4-d]pyrimidin-4-one (4r)

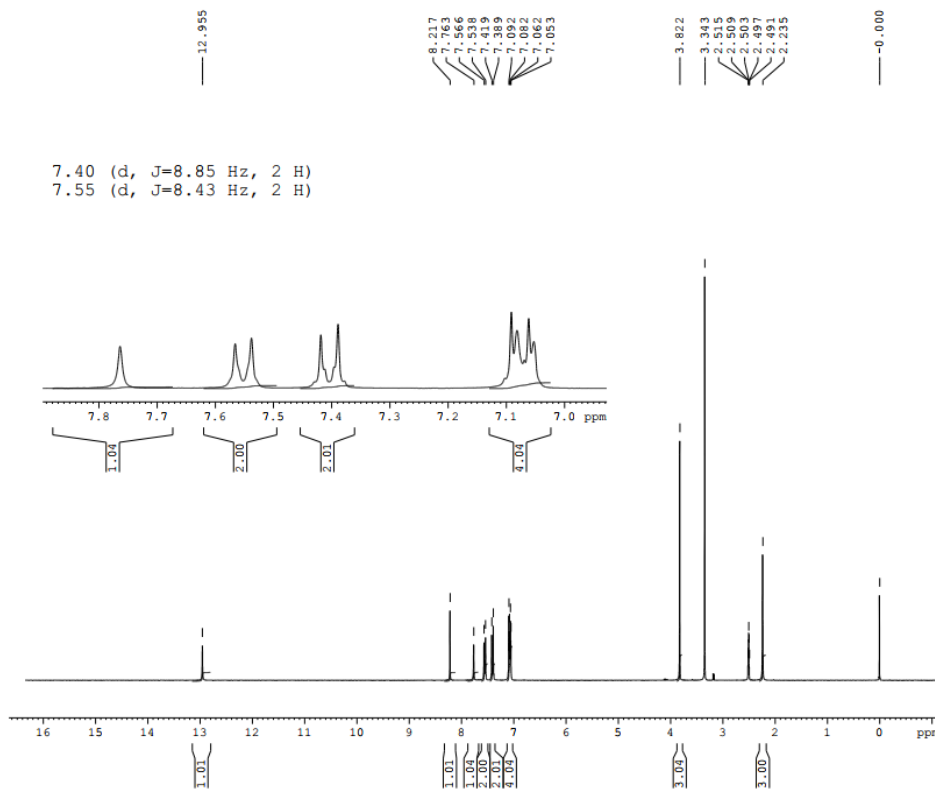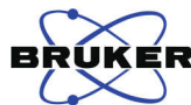

Current Data Parameters  
 NAME JN205  
 EXPNO 2  
 PROCNO 1

F2 - Acquisition Parameters  
 Date\_ 20210227  
 Time 14.09  
 INSTRUM FOURIER300  
 PROBHD 5 mm DUL 13C-1  
 PULPROG zg30  
 TD 65536  
 SOLVENT DMSO  
 NS 16  
 DS 2  
 SWH 6103.516 Hz  
 FIDRES 0.093132 Hz  
 AQ 5.3687091 sec  
 RG 83.0129  
 DW 81.920 usec  
 DE 6.50 usec  
 TE 298.2 K  
 D1 1.00000000 sec  
 TD0 1

===== CHANNEL f1 =====  
 SFO1 300.1618536 MHz  
 NUC1 1H  
 P1 13.50 usec  
 PLW1 9.30000019 W

F2 - Processing parameters  
 SI 65536  
 SF 300.1599992 MHz  
 WDW EM  
 SSB 0  
 LB 0.30 Hz  
 GB 0  
 PC 1.00

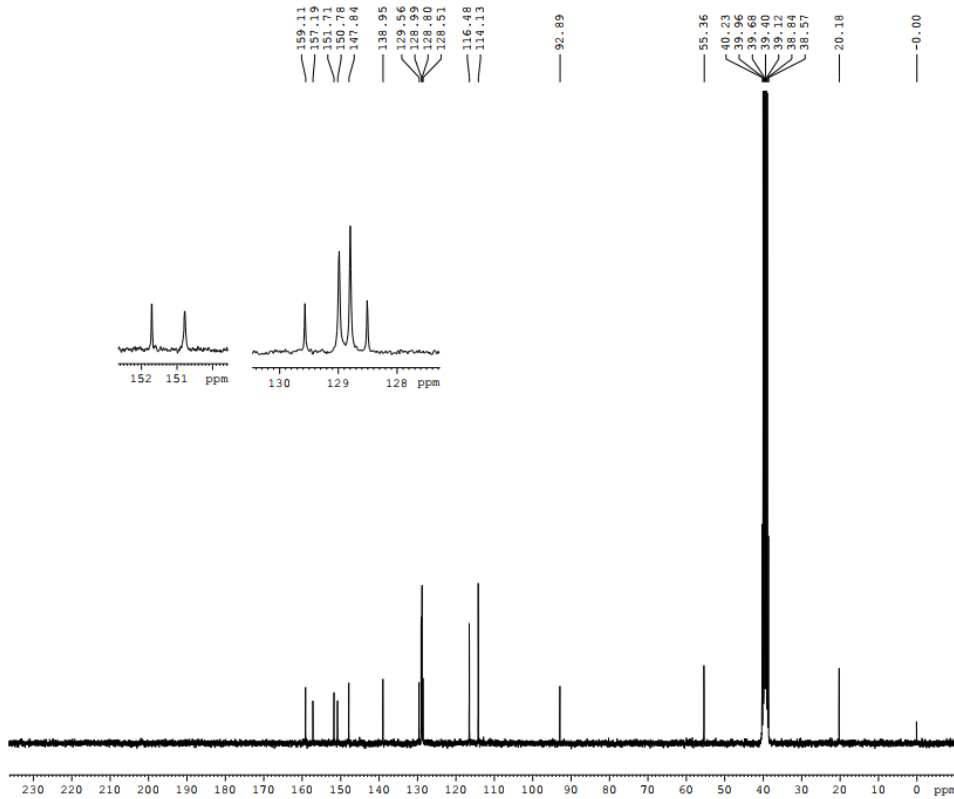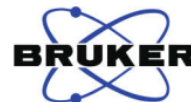

Current Data Parameters  
 NAME JN205  
 EXPNO 4  
 PROCNO 1

F2 - Acquisition Parameters  
 Date\_ 20210313  
 Time 13.04  
 INSTRUM FOURIER300  
 PROBHD 5 mm DUL 13C-1  
 PULPROG zgpg30  
 TD 65536  
 SOLVENT DMSO  
 NS 4096  
 DS 4  
 SWH 24414.063 Hz  
 FIDRES 0.372529 Hz  
 AQ 1.3421773 sec  
 RG 501.187  
 DW 20.480 usec  
 DE 6.50 usec  
 TE 298.3 K  
 D1 2.00000000 sec  
 D11 0.03000000 sec  
 D31 0.00001300 sec  
 D40 0.02898005 sec  
 L4 40  
 L5 57  
 P32 90.00 usec  
 TD0 4

===== CHANNEL f1 =====  
 SFO1 75.4828392 MHz  
 NUC1 13C  
 P1 13.00 usec  
 PLW1 22.00000000 W

===== CHANNEL f2 =====  
 SFO2 300.1612006 MHz  
 NUC2 1H  
 CPDPRG2 waltz16  
 PCPD2 90.00 usec  
 PLW2 9.30000019 W  
 PLW12 0.25149000 W  
 PLW13 0.12650000 W

F2 - Processing parameters  
 SI 32768  
 SF 75.4753345 MHz  
 WDW EM  
 SSB 0  
 LB 1.00 Hz  
 GB 0  
 PC 1.40

5-(4-Methoxyphenyl)-3-(4-methylphenylamino)-1,5-dihydro-4H-pyrazolo[3,4-d]pyrimidin-4-one (4r)

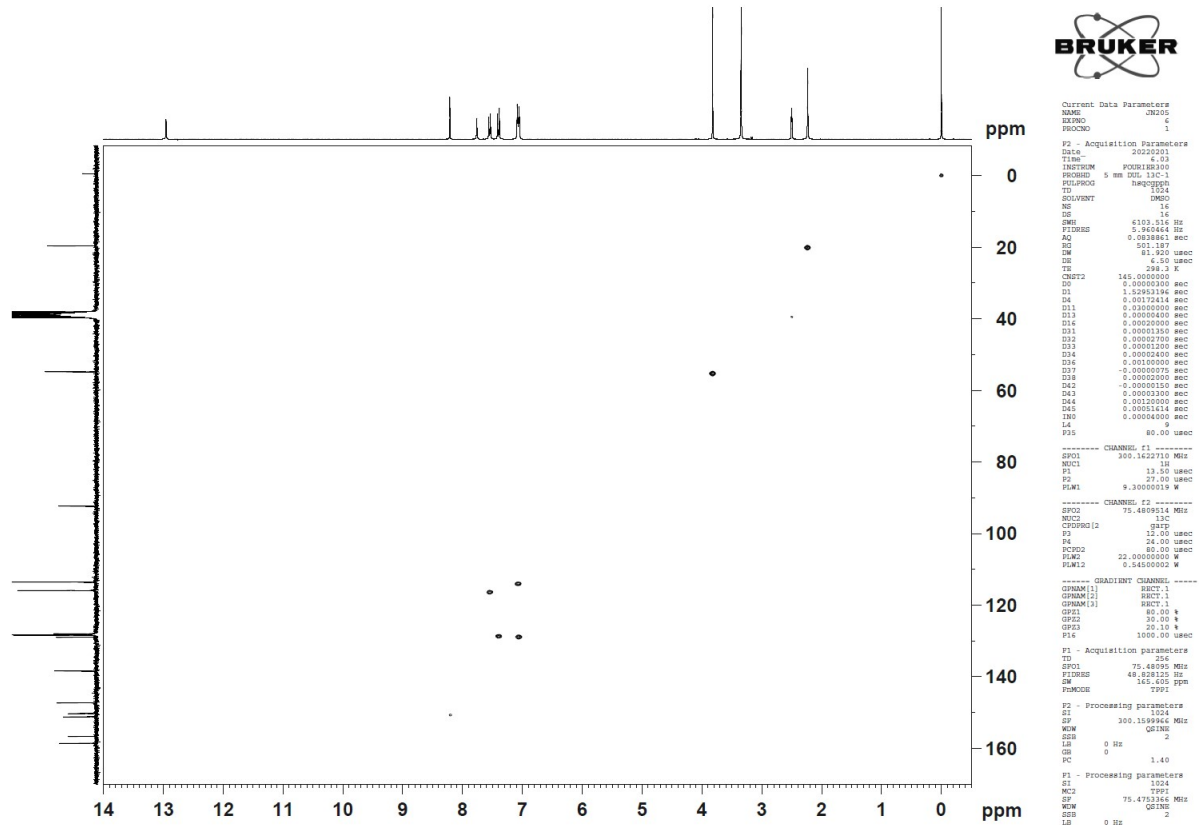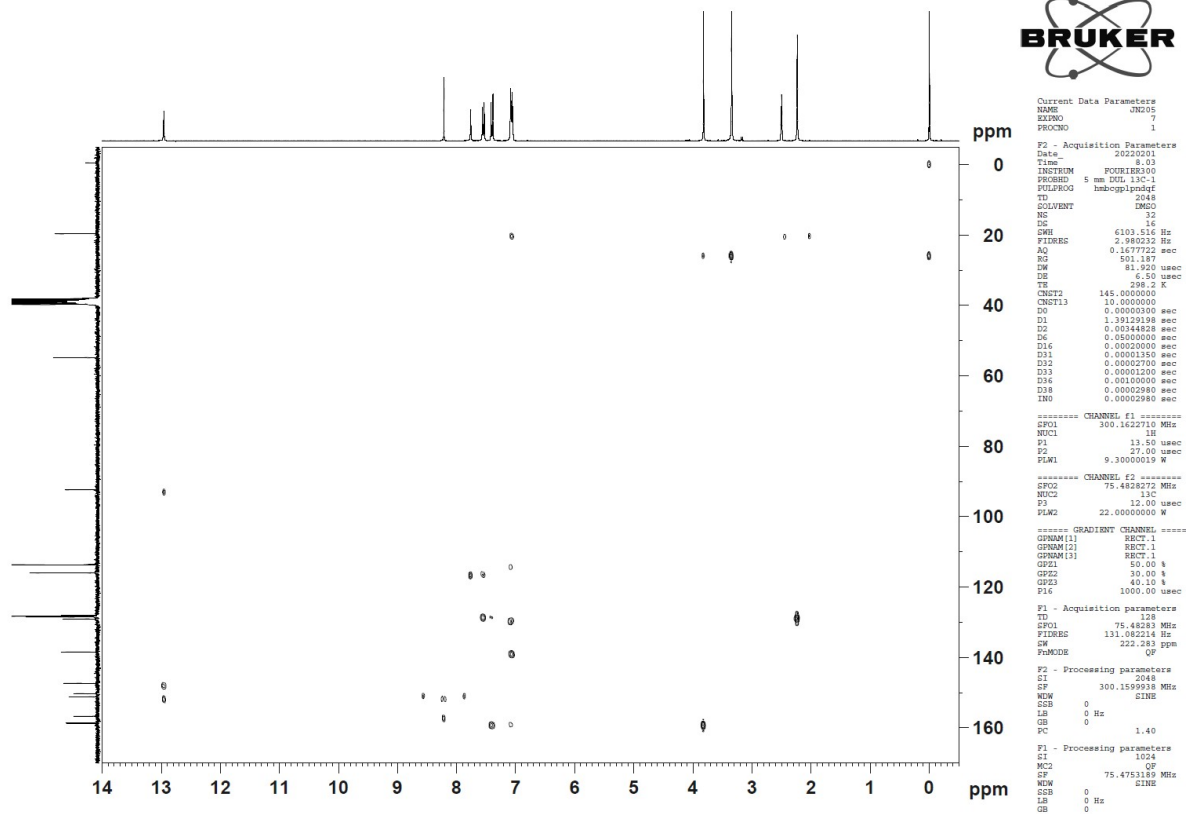

### 3-(2-Methoxyphenylamino)-5-(4-methoxyphenyl)-1,5-dihydro-4H-pyrazolo[3,4-d]pyrimidin-4-one (4s)

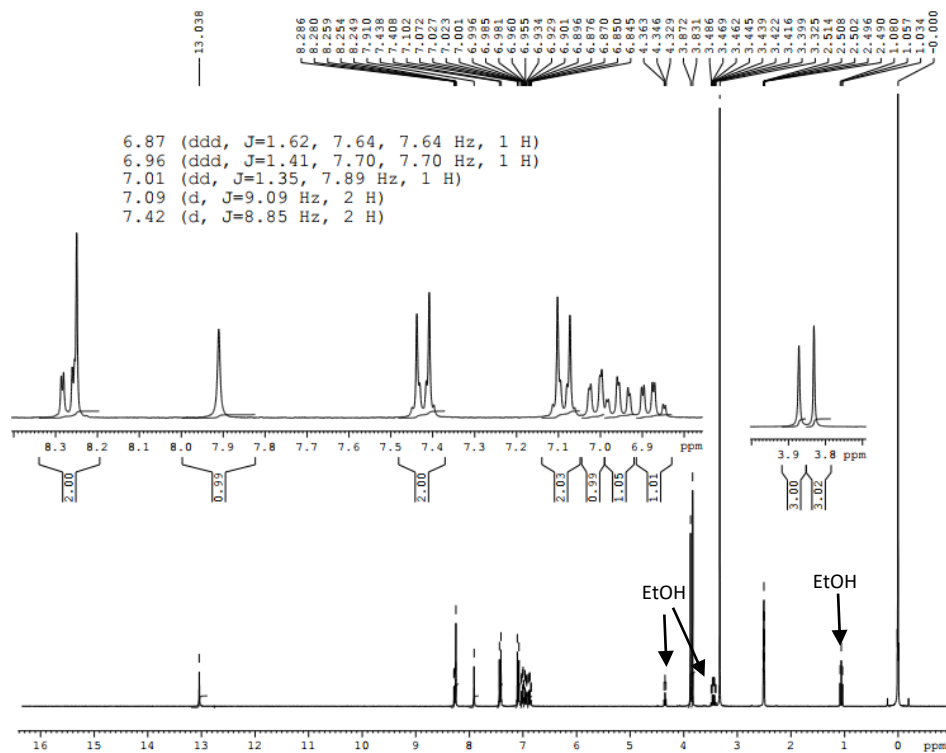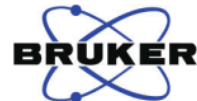

Current Data Parameters  
 NAME JN202  
 EXPNO 5  
 PROCNO 1

F2 - Acquisition Parameters  
 Date\_ 20210319  
 Time 14.45  
 INSTRUM FOURIER300  
 PROBHD 5 mm DUL 13C-1  
 PULPROG zg30  
 TD 65536  
 SOLVENT DMSO  
 NS 16  
 DS 2  
 SWH 6103.516 Hz  
 FIDRES 0.093132 Hz  
 AQ 5.3687091 sec  
 RG 106.345  
 DW 81.920 usec  
 DE 6.50 usec  
 TE 298.2 K  
 D1 1.0000000 sec  
 TDO 1

CHANNEL f1  
 SFO1 300.1618536 MHz  
 NUC1 1H  
 P1 13.50 usec  
 PLW1 9.30000019 W

F2 - Processing parameters  
 SI 65536  
 SF 300.1599994 MHz  
 WDW EM  
 SSB 0  
 LB 0.30 Hz  
 GB 0  
 PC 1.00

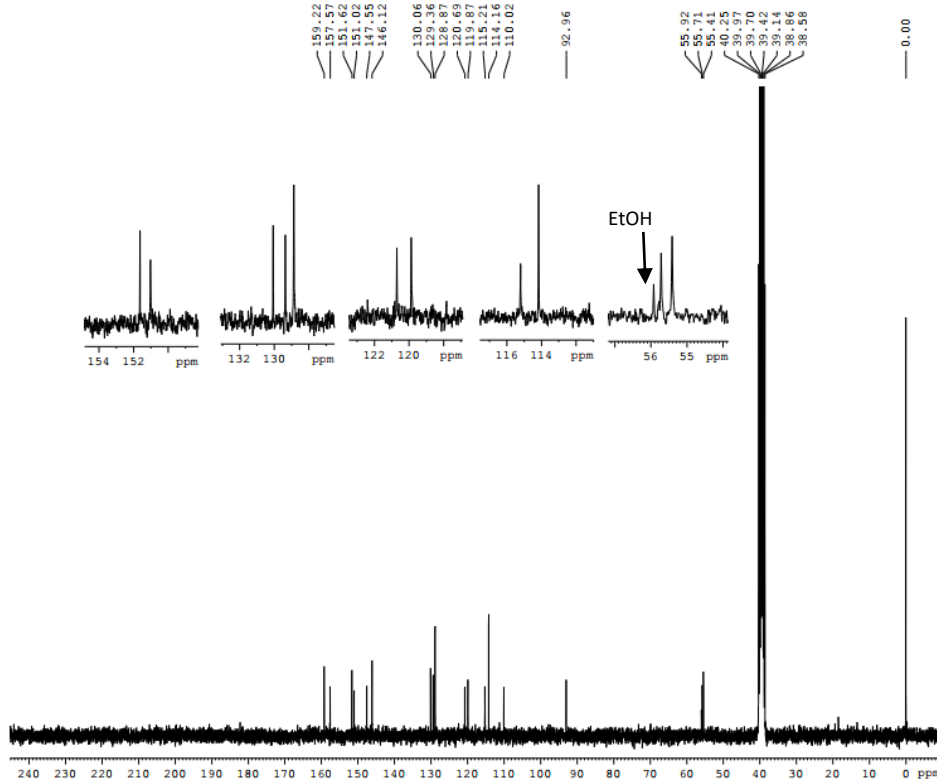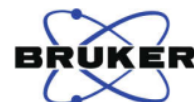

Current Data Parameters  
 NAME JN202  
 EXPNO 6  
 PROCNO 1

F2 - Acquisition Parameters  
 Date\_ 20210321  
 Time 18.04  
 INSTRUM FOURIER300  
 PROBHD 5 mm DUL 13C-1  
 PULPROG zgpg30  
 TD 65536  
 SOLVENT DMSO  
 NS 4096  
 DS 4  
 SWH 24414.063 Hz  
 FIDRES 0.372529 Hz  
 AQ 1.3421773 sec  
 RG 501.187  
 DW 20.480 usec  
 DE 6.50 usec  
 TE 298.3 K  
 D1 2.0000000 sec  
 D11 0.0300000 sec  
 D31 0.0001300 sec  
 D40 0.02898005 sec  
 I4 40  
 L5 57  
 F32 90.00 usec  
 TDO 4

CHANNEL f1  
 SFO1 75.4828392 MHz  
 NUC1 13C  
 P1 13.00 usec  
 PLW1 22.00000000 W

CHANNEL f2  
 SFO2 300.1612006 MHz  
 NUC2 1H  
 CPDPRG2 waltz16  
 PCPD2 90.00 usec  
 PLW2 9.30000019 W  
 PLW12 0.25149000 W  
 PLW13 0.12650000 W

F2 - Processing parameters  
 SI 32768  
 SF 75.4753346 MHz  
 WDW EM  
 SSB 0  
 LB 1.00 Hz  
 GB 0  
 PC 1.40

### 3-(4-Methoxyphenylamino)-5-(4-methoxyphenyl)-1,5-dihydro-4H-pyrazolo[3,4-d]pyrimidin-4-one (4t)

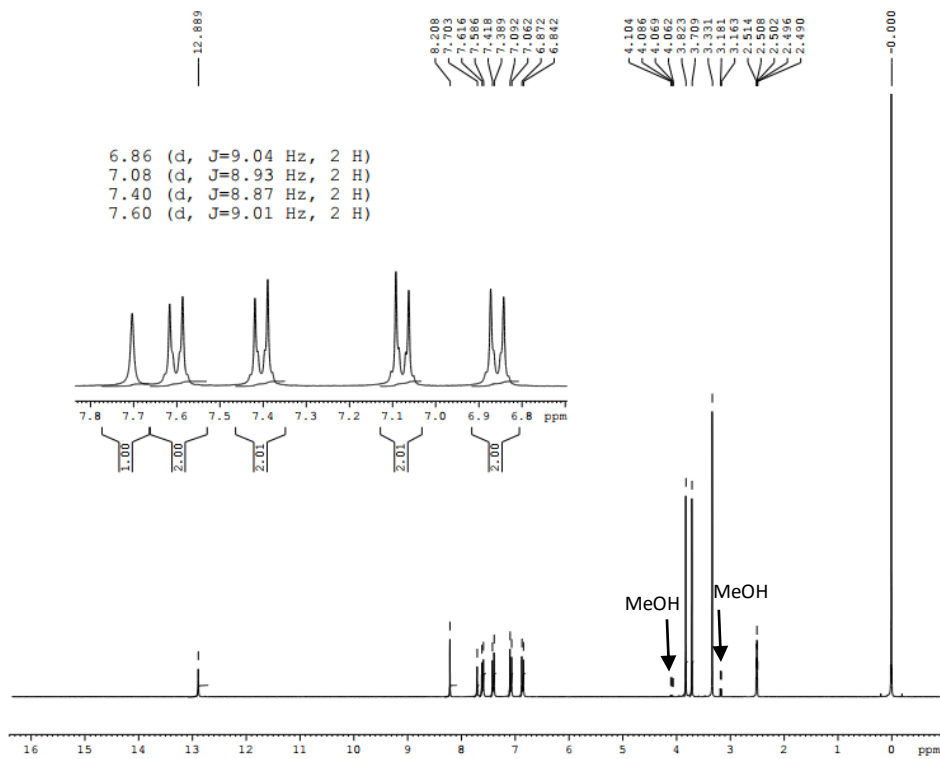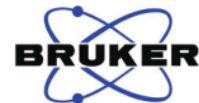

Current Data Parameters  
 NAME JN206  
 EXPNO 5  
 PROCNO 1

F2 - Acquisition Parameters  
 Date\_ 20210319  
 Time 14.49  
 INSTRUM FOURIER300  
 PROBHD 5 mm DUL 13C-1  
 PULPROG zg30  
 TD 65536  
 SOLVENT DMSO  
 NS 16  
 DS 2  
 SWH 6103.516 Hz  
 FIDRES 0.093132 Hz  
 AQ 5.3687091 sec  
 RG 87.9148  
 DW 81.920 usec  
 DE 6.50 usec  
 TE 298.2 K  
 D1 1.00000000 sec  
 TDO 1

----- CHANNEL f1 -----  
 SFO1 300.1618536 MHz  
 NUC1 1H  
 P1 13.50 usec  
 PLW1 9.30000019 W

F2 - Processing parameters  
 SI 65536  
 SF 300.1599993 MHz  
 WDW EM  
 SSB 0  
 LB 0.30 Hz  
 GB 0  
 PC 1.00

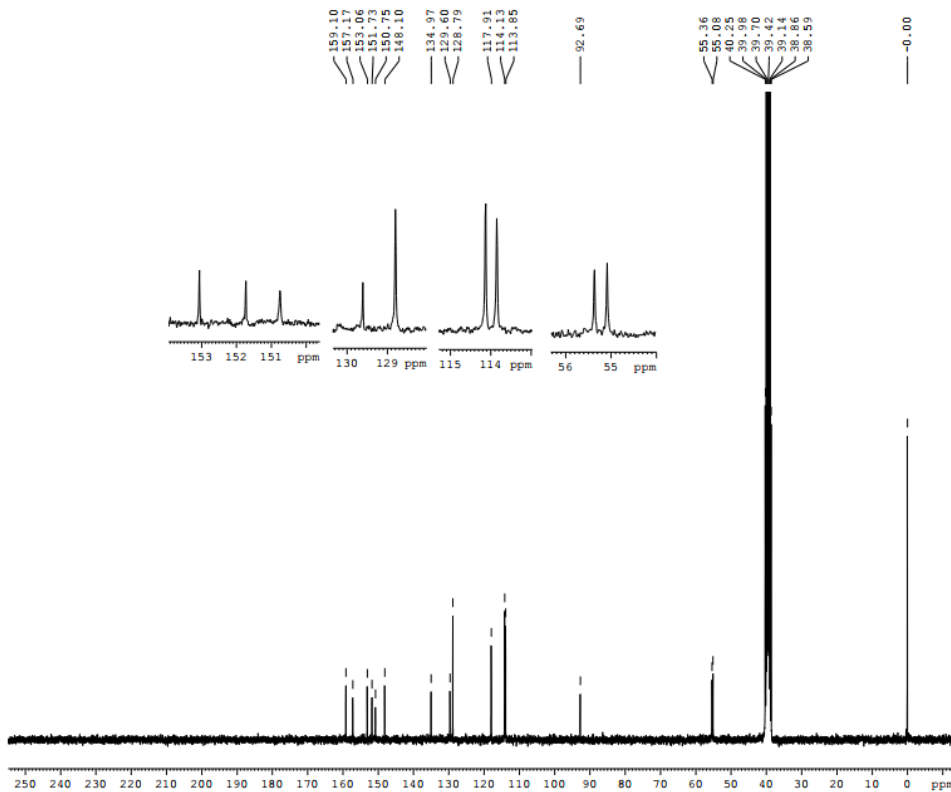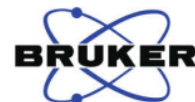

Current Data Parameters  
 NAME JN206  
 EXPNO 6  
 PROCNO 1

F2 - Acquisition Parameters  
 Date\_ 20210321  
 Time 5.42  
 INSTRUM FOURIER300  
 PROBHD 5 mm DUL 13C-1  
 PULPROG zgpg30  
 TD 65536  
 SOLVENT DMSO  
 NS 6144  
 DS 4  
 SWH 24414.063 Hz  
 FIDRES 0.372529 Hz  
 AQ 1.3421773 sec  
 RG 501.187  
 DW 20.480 usec  
 DE 6.50 usec  
 TE 298.3 K  
 D1 2.00000000 sec  
 D11 0.03000000 sec  
 D31 0.00001300 sec  
 D40 0.02898005 sec  
 L4 40  
 L5 57  
 P32 90.00 usec  
 TDO 6

----- CHANNEL f1 -----  
 SFO1 75.4828392 MHz  
 NUC1 13C  
 P1 13.00 usec  
 PLW1 22.00000000 W

----- CHANNEL f2 -----  
 SFO2 300.1612006 MHz  
 NUC2 1H  
 CPDPRG2 waltz16  
 PCPD2 90.00 usec  
 PLM2 9.30000019 W  
 PLW12 0.25149000 W  
 PLW13 0.12650000 W

F2 - Processing parameters  
 SI 32768  
 SF 75.4753346 MHz  
 WDW EM  
 SSB 0  
 LB 1.00 Hz  
 GB 0  
 PC 1.40
